# Supplementary material for: Synthesis of diphenyl-(2-thienyl)phosphine, its chalcogenide derivatives and a series of novel complexes of lanthanide nitrates and triflates
Source: Royal Society of Chemistry journal article supplement (doi:10.1039/d2dt01570f), 2022-01-01
Supplement: d2dt01570f1.pdf [file d2dt01570f1.pdf]

# Synthesis of diphenyl-(2-thienyl)phosphine, its chalcogenide derivatives and a series of novel complexes of lanthanide nitrates and triflates

## Supplementary Information

Troy Luster,<sup>a</sup> Kyle Korman,<sup>a</sup> Hannah Van de Roovaart,<sup>a</sup> Georgia Sands,<sup>a</sup> Kylie Dunn,<sup>a</sup> Anthony Spyker,<sup>a</sup> Richard J. Staples,<sup>b</sup> Shannon M. Biros<sup>a</sup> and John Bender<sup>a</sup>

<sup>a</sup>Department of Chemistry, Grand Valley State University, Allendale, MI 49401, USA;

<sup>b</sup>Center for Crystallographic Research, Department of Chemistry, Michigan State University, 578 S. Shaw Lane, East Lansing, MI 48824, USA.

\* Corresponding author: John Bender

### Table of Contents

#### X-Ray data

|                                                                                                      |    |
|------------------------------------------------------------------------------------------------------|----|
| A. Ph <sub>2</sub> thienylP=O ( <b>4</b> ).....                                                      | 2  |
| B. Ph <sub>2</sub> thienylP=S ( <b>5</b> ).....                                                      | 5  |
| C. Ph <sub>2</sub> thienylP=Se ( <b>6</b> ).....                                                     | 7  |
| D. La( <b>4</b> ) <sub>3</sub> (NO <sub>3</sub> ) <sub>3</sub> .....                                 | 9  |
| E. Sm( <b>4</b> ) <sub>3</sub> (NO <sub>3</sub> ) <sub>3</sub> .....                                 | 12 |
| F. Pr( <b>4</b> ) <sub>3</sub> (NO <sub>3</sub> ) <sub>3</sub> .....                                 | 15 |
| G. Tb( <b>4</b> ) <sub>3</sub> (NO <sub>3</sub> ) <sub>3</sub> (C <sub>6</sub> H <sub>6</sub> )..... | 19 |
| H. Er( <b>4</b> ) <sub>3</sub> (NO <sub>3</sub> ) <sub>3</sub> (C <sub>6</sub> H <sub>6</sub> )..... | 22 |
| I. Tb( <b>4</b> ) <sub>4</sub> (OTf) <sub>2</sub> •OTf.....                                          | 25 |

#### NMR data

|                                                                      |    |
|----------------------------------------------------------------------|----|
| A. Ph <sub>2</sub> thienylP ( <b>3</b> ).....                        | 30 |
| B. Ph <sub>2</sub> thienylP=O ( <b>4</b> ).....                      | 33 |
| C. Ph <sub>2</sub> thienylP=S ( <b>5</b> ).....                      | 37 |
| D. Ph <sub>2</sub> thienylP=Se ( <b>6</b> ).....                     | 41 |
| E. La( <b>4</b> ) <sub>3</sub> (NO <sub>3</sub> ) <sub>3</sub> ..... | 44 |
| F. La( <b>4</b> ) <sub>3</sub> (OTf) <sub>3</sub> .....              | 46 |
| G. Sm( <b>4</b> ) <sub>3</sub> (OTf) <sub>3</sub> .....              | 48 |

## I. X-Ray Crystallography

For all figures in this section thermal ellipsoids are shown at the 50% probability level. Standard CPK colors are used throughout, and all non-polar hydrogen atoms have been omitted for clarity.

- For the free ligands **4-6**, the numbering scheme for all atoms is shown on the thermal ellipsoid plot.
- For the Ln-ligand complexes, the numbering scheme for all atoms but the pendant phenyl rings are shown with a ball and stick model.

### A. Ph<sub>2</sub>thienylP=O (**4**)

In this structure, the electron density corresponding to the thienyl ring was disordered. This disorder was modelled over two positions on the trigonal pyramid of the phosphorus atom with a 0.80:0.20 occupancy ratio. Only one part is shown below for clarity. All hydrogen atoms have been omitted for clarity, and atoms are depicted using standard CPK colors. SADI commands were used to give bond lengths and angles that are consistent with literature values, and EADP commands were used to give reasonable thermal values.

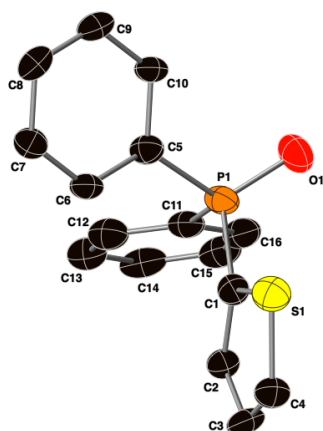

## Experimental

Single crystals of C<sub>16</sub>H<sub>13</sub>OPS (**4**) were grown by slow evaporation from a solution in CDCl<sub>3</sub>. A suitable crystal was selected and mounted on a nylon loop using a very small amount of paratone oil on a XtaLAB Synergy, Dualflex, HyPix diffractometer. The crystal was kept at 99.98(13) K during data collection. Using Olex2 [1], the structure was solved with the the structure was solved with the ShelXS [2] structure solution program using Direct Methods and refined with the ShelXL [3] refinement package using Least Squares minimization.

1. Dolomanov, O.V., Bourhis, L.J., Gildea, R.J, Howard, J.A.K. & Puschmann, H. (2009), J. Appl. Cryst. 42, 339-341.
2. Sheldrick, G.M. (2008). Acta Cryst. A64, 112-122.
3. Sheldrick, G.M. (2015). Acta Cryst. C71, 3-8.

### Crystal structure determination of **4**

**Crystal Data** for C<sub>16</sub>H<sub>13</sub>OPS (*M* = 284.29 g/mol): monoclinic, space group P2<sub>1</sub>/n (no. 14), *a* = 9.6867(2) Å, *b* = 9.9115(2) Å, *c* = 14.6285(3) Å, *β* = 96.773(2)°, *V* = 1394.67(5) Å<sup>3</sup>, *Z* = 4, *T* = 99.98(13) K, *μ*(CuKα) = 3.040 mm<sup>-1</sup>, *D*<sub>calc</sub> = 1.354 g/cm<sup>3</sup>, 10173 reflections measured (10.414° ≤ 2θ ≤ 153.192°), 2697 unique (*R*<sub>int</sub> = 0.0393, *R*<sub>sigma</sub> = 0.0359) which were used in all calculations. The final *R*<sub>1</sub> was 0.0713 (*I* > 2σ(*I*)) and *wR*<sub>2</sub> was 0.2002 (all data).

## Refinement model description

Number of restraints - 2, number of constraints - unknown.

Details:

### 1. Fixed Uiso

At 1.2 times of:

All C(H) groups

### 2. Restrained distances

$C5-S1A \approx C5-C6$

with sigma of 0.02

$C7-S1A \approx C7-C6$

with sigma of 0.02

### 3. Uiso/Uanis restraints and constraints

$U_{\text{anis}}(C3A) = U_{\text{anis}}(C8)$

$U_{\text{anis}}(C6) = U_{\text{anis}}(C10)$

$U_{\text{anis}}(S1A) = U_{\text{anis}}(S1)$

$U_{\text{anis}}(C2A) = U_{\text{anis}}(C9)$

$U_{\text{anis}}(C10A) = U_{\text{anis}}(C7A)$

$U_{\text{anis}}(C2) = U_{\text{anis}}(C6A)$

$U_{\text{anis}}(C4A) = U_{\text{anis}}(C7)$

$U_{\text{anis}}(C10A) = U_{\text{anis}}(C4)$

$U_{\text{anis}}(C9A) = U_{\text{anis}}(C2)$

$U_{\text{anis}}(C8A) = U_{\text{anis}}(C6A)$

$U_{\text{anis}}(C6A) = U_{\text{anis}}(C2)$

### 4. Others

Fixed Sof: S1(0.8) C6A(0.2) H6A(0.2) C7A(0.2) H7A(0.2) C8A(0.2) H8A(0.2)

C9A(0.2) H9A(0.2) C10A(0.2) H10A(0.2) C2(0.8) H2(0.8) C3(0.8) H3(0.8) C4(0.8)

H4(0.8) C6(0.8) H6(0.8) C7(0.8) H7(0.8) C8(0.8) H8(0.8) C9(0.8) H9(0.8)

C10(0.8) H10(0.8) S1A(0.2) C2A(0.2) H2A(0.2) C3A(0.2) H3A(0.2) C4A(0.2)

H4A(0.2)

### 5.a Aromatic/amide H refined with riding coordinates:

C6A(H6A), C7A(H7A), C8A(H8A), C9A(H9A), C10A(H10A), C2(H2), C3(H3), C4(H4),

C6(H6), C7(H7), C8(H8), C9(H9), C10(H10), C12(H12), C13(H13), C14(H14),

C15(H15), C16(H16), C2A(H2A), C3A(H3A), C4A(H4A)

### 5.b Fitted hexagon refined as free rotating group:

C1(C6A,C7A,C8A,C9A,C10A), C5(C6,C7,C8,C9,C10)

**Table 1 Crystal data and structure refinement for 4.**

|                                             |                                                               |
|---------------------------------------------|---------------------------------------------------------------|
| CCDC Number                                 | 2096359                                                       |
| Empirical formula                           | C <sub>16</sub> H <sub>13</sub> OPS                           |
| Formula weight                              | 284.29                                                        |
| Temperature/K                               | 99.98(13)                                                     |
| Crystal system                              | monoclinic                                                    |
| Space group                                 | P2 <sub>1</sub> /n                                            |
| a/Å                                         | 9.6867(2)                                                     |
| b/Å                                         | 9.9115(2)                                                     |
| c/Å                                         | 14.6285(3)                                                    |
| α/°                                         | 90                                                            |
| β/°                                         | 96.773(2)                                                     |
| γ/°                                         | 90                                                            |
| Volume/Å <sup>3</sup>                       | 1394.67(5)                                                    |
| Z                                           | 4                                                             |
| ρ <sub>calc</sub> /g/cm <sup>3</sup>        | 1.354                                                         |
| μ/mm <sup>-1</sup>                          | 3.040                                                         |
| F(000)                                      | 592.0                                                         |
| Crystal size/mm <sup>3</sup>                | 0.262 × 0.136 × 0.049                                         |
| Radiation                                   | CuKα (λ = 1.54184)                                            |
| 2θ range for data collection/°              | 10.414 to 153.192                                             |
| Index ranges                                | -11 ≤ h ≤ 12, -8 ≤ k ≤ 12, -18 ≤ l ≤ 16                       |
| Reflections collected                       | 10173                                                         |
| Independent reflections                     | 2697 [R <sub>int</sub> = 0.0393, R <sub>sigma</sub> = 0.0359] |
| Data/restraints/parameters                  | 2697/2/169                                                    |
| Goodness-of-fit on F <sup>2</sup>           | 1.088                                                         |
| Final R indexes [I ≥ 2σ (I)]                | R <sub>1</sub> = 0.0713, wR <sub>2</sub> = 0.1953             |
| Final R indexes [all data]                  | R <sub>1</sub> = 0.0761, wR <sub>2</sub> = 0.2002             |
| Largest diff. peak/hole / e Å <sup>-3</sup> | 1.50/-0.77                                                    |

## B. Ph<sub>2</sub>thienylP=S (5)

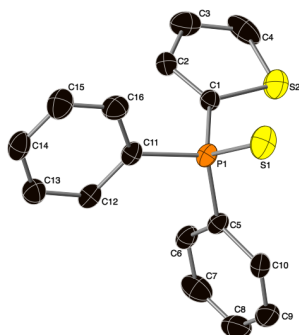

## Experimental

Single crystals of C<sub>16</sub>H<sub>13</sub>PS<sub>2</sub> were grown by slow evaporation of a CDCl<sub>3</sub> solution. A suitable crystal was selected and mounted using a small amount of paratone oil on a nylon loop on a Bruker APEX-II CCD diffractometer. The crystal was kept at 296(2) K during data collection. Using Olex2 [1], the structure was solved with the ShelXS [2] structure solution program using Direct Methods and refined with the ShelXL [3] refinement package using Least Squares minimization.

4. Dolomanov, O.V., Bourhis, L.J., Gildea, R.J, Howard, J.A.K. & Puschmann, H. (2009), J. Appl. Cryst. 42, 339-341.
5. Sheldrick, G.M. (2008). Acta Cryst. A64, 112-122.
6. Sheldrick, G.M. (2015). Acta Cryst. C71, 3-8.

## Crystal structure determination of [5]

**Crystal Data** for C<sub>16</sub>H<sub>13</sub>PS<sub>2</sub> (*M* = 300.35 g/mol): monoclinic, space group P2<sub>1</sub>/n (no. 14), *a* = 10.18080(10) Å, *b* = 9.50350(10) Å, *c* = 14.9030(2) Å, *β* = 94.0376(5)°, *V* = 1438.33(3) Å<sup>3</sup>, *Z* = 4, *T* = 296(2) K, *μ*(CuKα) = 4.246 mm<sup>-1</sup>, *D*<sub>calc</sub> = 1.387 g/cm<sup>3</sup>, 17457 reflections measured (10.196° ≤ 2Θ ≤ 144.3°), 2831 unique (*R*<sub>int</sub> = 0.0344, *R*<sub>sigma</sub> = 0.0237) which were used in all calculations. The final *R*<sub>1</sub> was 0.0548 (*I* > 2σ(*I*)) and *wR*<sub>2</sub> was 0.1564 (all data).

## Refinement model description

Number of restraints - 0, number of constraints - unknown.

Details:

1. Fixed Uiso

At 1.2 times of:

All C(H) groups

2.a Aromatic/amide H refined with riding coordinates:

C2(H2), C3(H3), C4(H4), C6(H6), C7(H7), C8(H8), C9(H9), C10(H10), C12(H12), C13(H13), C14(H14), C15(H15), C16(H16)

Table 1 Crystal data and structure refinement for **5**

|                                               |                                                               |
|-----------------------------------------------|---------------------------------------------------------------|
| Identification code                           | <b>5</b>                                                      |
| CCDC Number                                   | 1844568                                                       |
| Empirical formula                             | $\text{C}_{16}\text{H}_{13}\text{PS}_2$                       |
| Formula weight                                | 300.35                                                        |
| Temperature/K                                 | 296(2)                                                        |
| Crystal system                                | monoclinic                                                    |
| Space group                                   | $P2_1/n$                                                      |
| $a/\text{\AA}$                                | 10.18080(10)                                                  |
| $b/\text{\AA}$                                | 9.50350(10)                                                   |
| $c/\text{\AA}$                                | 14.9030(2)                                                    |
| $\alpha/^\circ$                               | 90                                                            |
| $\beta/^\circ$                                | 94.0376(5)                                                    |
| $\gamma/^\circ$                               | 90                                                            |
| Volume/ $\text{\AA}^3$                        | 1438.33(3)                                                    |
| $Z$                                           | 4                                                             |
| $\rho_{\text{calc}}/\text{g cm}^{-3}$         | 1.387                                                         |
| $\mu/\text{mm}^{-1}$                          | 4.246                                                         |
| $F(000)$                                      | 624.0                                                         |
| Crystal size/ $\text{mm}^3$                   | $0.388 \times 0.221 \times 0.053$                             |
| Radiation                                     | $\text{CuK}\alpha$ ( $\lambda = 1.54178$ )                    |
| $2\theta$ range for data collection/ $^\circ$ | 10.196 to 144.3                                               |
| Index ranges                                  | $-11 \leq h \leq 12, -11 \leq k \leq 11, -18 \leq l \leq 18$  |
| Reflections collected                         | 17457                                                         |
| Independent reflections                       | 2831 [ $R_{\text{int}} = 0.0344, R_{\text{sigma}} = 0.0237$ ] |
| Data/restraints/parameters                    | 2831/0/172                                                    |
| Goodness-of-fit on $F^2$                      | 1.058                                                         |
| Final R indexes [ $I \geq 2\sigma(I)$ ]       | $R_1 = 0.0548, wR_2 = 0.1545$                                 |
| Final R indexes [all data]                    | $R_1 = 0.0569, wR_2 = 0.1564$                                 |
| Largest diff. peak/hole / $e \text{\AA}^{-3}$ | 0.90/-0.88                                                    |

### C. Ph<sub>2</sub>thienylP=Se (6)

In this structure the electron density corresponding to the thienyl ring was disordered. This disorder was modeled as two rotational isomers (rotated 180 ° around the P1-C1 bond) with a 0.893:0.107 ratio.

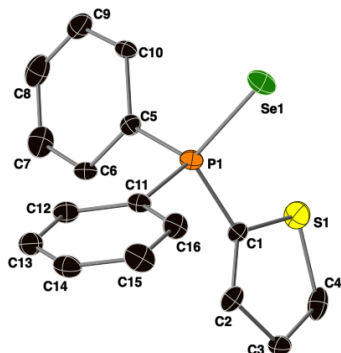

### Experimental

Single crystals of C<sub>16</sub>H<sub>13</sub>PSSe were grown by slow evaporation of a CDCl<sub>3</sub> solution. A suitable crystal was selected and mounted on a nylon loop using a small amount of paratone oil on a Bruker APEX-II CCD diffractometer. The crystal was kept at 173(2) K during data collection. Using Olex2 [1], the structure was solved with the ShelXT [2] structure solution program using Direct Methods and refined with the ShelXL [3] refinement package using Least Squares minimization.

1. Dolomanov, O.V., Bourhis, L.J., Gildea, R.J, Howard, J.A.K. & Puschmann, H. (2009), J. Appl. Cryst. 42, 339-341.
2. Sheldrick, G.M. (2015). Acta Cryst. A71, 3-8.
3. Sheldrick, G.M. (2015). Acta Cryst. C71, 3-8.

### Crystal structure determination of [6]

**Crystal Data** for C<sub>16</sub>H<sub>13</sub>PSSe (*M* = 347.25 g/mol): monoclinic, space group P2<sub>1</sub>/n (no. 14), *a* = 10.398(3) Å, *b* = 9.531(3) Å, *c* = 14.811(5) Å, *β* = 93.489(4)°, *V* = 1465.2(8) Å<sup>3</sup>, *Z* = 4, *T* = 173(2) K, *μ*(MoKα) = 2.797 mm<sup>-1</sup>, *D*<sub>calc</sub> = 1.574 g/cm<sup>3</sup>, 11733 reflections measured (4.656° ≤ 2θ ≤ 50.702°), 2683 unique (*R*<sub>int</sub> = 0.0445, *R*<sub>sigma</sub> = 0.0386) which were used in all calculations. The final *R*<sub>1</sub> was 0.0465 (*I* > 2σ(*I*)) and *wR*<sub>2</sub> was 0.1324 (all data).

### Refinement model description

Number of restraints - 0, number of constraints - unknown.

Details:

1. Fixed Uiso

At 1.2 times of:

All C(H) groups

2.a Aromatic/amide H refined with riding coordinates:

C2(H2), C3(H3), C4(H4), C6(H6), C7(H7), C8(H8), C9(H9), C10(H10), C12(H12),

C13(H13), C14(H14), C15(H15), C16(H16)

Table 1 Crystal data and structure refinement for **6**.

|                                             |                                                                |
|---------------------------------------------|----------------------------------------------------------------|
| Identification code                         | <b>6</b>                                                       |
| CCDC Number                                 | 1844765                                                        |
| Empirical formula                           | C <sub>16</sub> H <sub>13</sub> PSSe                           |
| Formula weight                              | 347.25                                                         |
| Temperature/K                               | 173(2)                                                         |
| Crystal system                              | monoclinic                                                     |
| Space group                                 | P2 <sub>1</sub> /n                                             |
| a/Å                                         | 10.398(3)                                                      |
| b/Å                                         | 9.531(3)                                                       |
| c/Å                                         | 14.811(5)                                                      |
| $\alpha$ /°                                 | 90                                                             |
| $\beta$ /°                                  | 93.489(4)                                                      |
| $\gamma$ /°                                 | 90                                                             |
| Volume/Å <sup>3</sup>                       | 1465.2(8)                                                      |
| Z                                           | 4                                                              |
| $\rho_{\text{calc}}$ /cm <sup>3</sup>       | 1.574                                                          |
| $\mu$ /mm <sup>-1</sup>                     | 2.797                                                          |
| F(000)                                      | 696.0                                                          |
| Crystal size/mm <sup>3</sup>                | 0.368 × 0.219 × 0.034                                          |
| Radiation                                   | MoK $\alpha$ ( $\lambda$ = 0.71073)                            |
| 2 $\Theta$ range for data collection/°      | 4.656 to 50.702                                                |
| Index ranges                                | -12 ≤ h ≤ 12, -11 ≤ k ≤ 11, -17 ≤ l ≤ 17                       |
| Reflections collected                       | 11733                                                          |
| Independent reflections                     | 2683 [ $R_{\text{int}}$ = 0.0445, $R_{\text{sigma}}$ = 0.0386] |
| Data/restraints/parameters                  | 2683/0/172                                                     |
| Goodness-of-fit on F <sup>2</sup>           | 1.065                                                          |
| Final R indexes [ $I \geq 2\sigma(I)$ ]     | $R_1$ = 0.0465, $wR_2$ = 0.1233                                |
| Final R indexes [all data]                  | $R_1$ = 0.0607, $wR_2$ = 0.1324                                |
| Largest diff. peak/hole / e Å <sup>-3</sup> | 0.73/-0.70                                                     |

### Details regarding modeling of the complete molecular disorder present in structures $\text{Ln}(\mathbf{4})_3(\text{NO}_3)_3$ (Ln = La, Pr, Sm)

The electron density of each of these structures was disordered for each atom except for the Ln metal. The asymmetric unit of these structures contain the Ln metal, one phosphine ligand, and one bidentate nitrate anion. Due to the high symmetry of the space group the data was solved in (R-3), when the asymmetric unit is grown the full structure depicts six ligands and six bidentate nitrates occupying the same positions around the metal center. Since the La metal carries a 3+ charge, and there are no outer sphere nitrate anions present, there must be three bidentate nitrates bound directly to the metal center. This means that there is complete molecular disorder in this structure. For ease of discussion, if the bidentate nitrate groups are considered to be monodentate ligands, then the  $\text{La}^{3+}$  center would be six-coordinate with pseudo-octahedral geometry (see figure below).

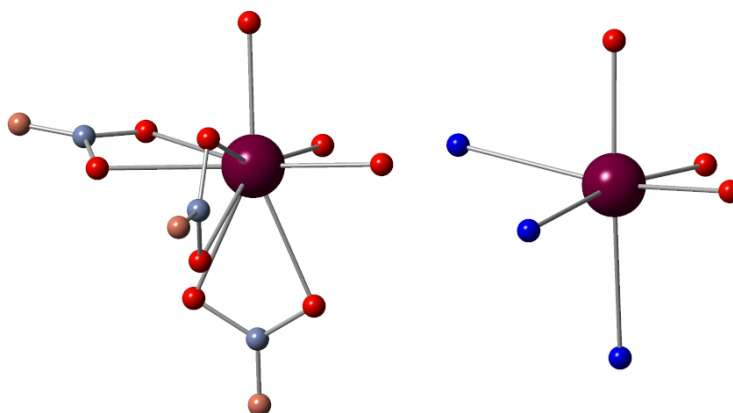

The metal coordination sphere of the  $[\text{Ln}(\mathbf{4})_3(\text{NO}_3)_3]$  crystal structures. Left: all nine oxygen atoms (red) that coordinate to the metal (nitrogen and non-coordinating oxygen atom of the nitrate groups are depicted with lighter blue and red colors) with a tricapped trigonal prism polyhedral schematic (magenta) generated using CrystalMaker; Right: depiction of the bidentate nitrates as monodentate ligands through the nitrogen atom to give a six-coordinate metal (octahedral geometry).

If the complex's geometry is thought of as an octahedron, it cannot be determined directly from the electron density data whether the *facial* or *meridional* isomer of this octahedron exists. However, when we built the model of the *meridional* isomer by hand, steric clashing existed between aromatic rings of neighboring phosphine oxide ligands. When we built the model of the *facial* isomer by hand, there was no steric clashing between ligands. Based on this analysis we concluded that the *facial* isomer is present in the solid state. The figures here, and in the body of the manuscript, were prepared by building this model by hand (by manually deleting the atoms not present in the *fac*-isomer).

#### D. $\text{La(4)}_3(\text{NO}_3)_3$

In this structure, the electron density corresponding to the thienyl rings were disordered. This disorder was modelled over two orientations with a 0.84:0.16 occupancy ratio. Only one part is shown below for clarity. All hydrogen atoms have been omitted for clarity, and atoms are depicted using standard CPK colors (La = magenta). AFIX 66 and RIGU commands were used to give bond lengths and angles that are consistent with literature values. The figure on the left depicts the thermal ellipsoids of all atoms; the figure on the right shows the atom numbering scheme for all unique atoms, with the pendant phenyl rings omitted for clarity.

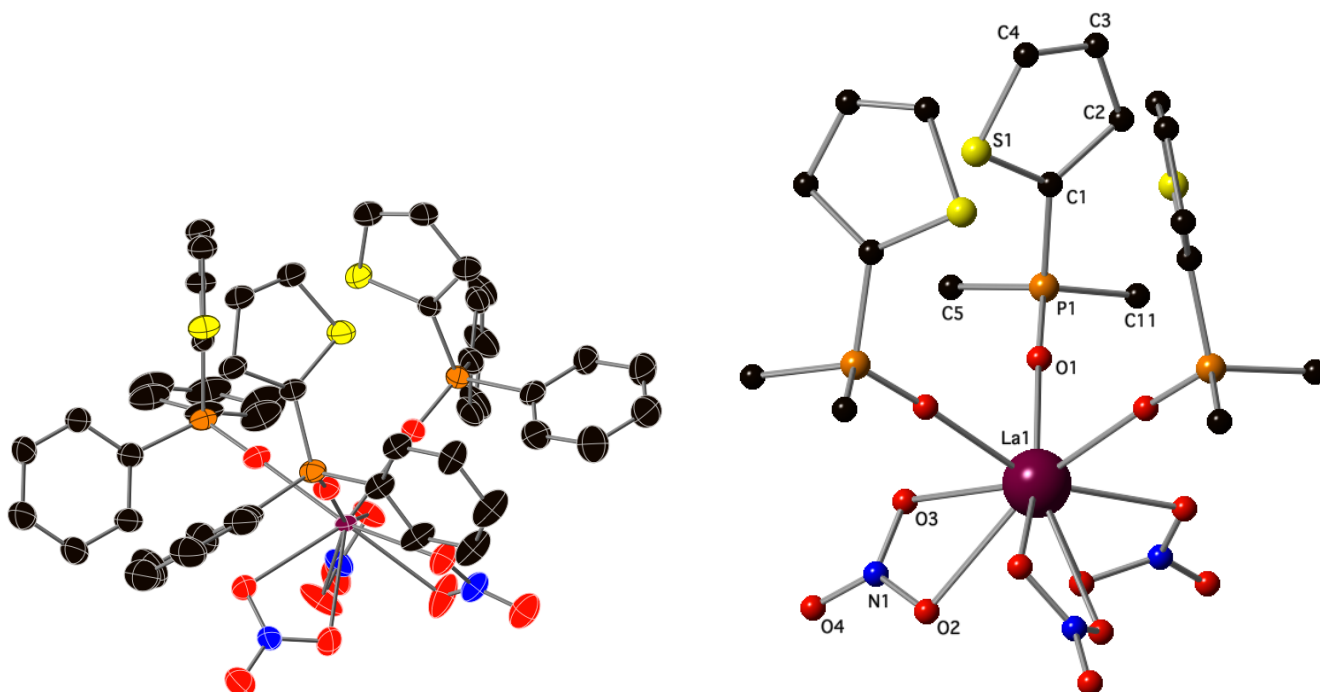

#### Experimental

Single crystals of  $\text{C}_{48}\text{H}_{39}\text{LaN}_3\text{O}_{12}\text{P}_3\text{S}_3$  were grown by slow evaporation from a solution of  $\text{CHCl}_3/\text{CH}_2\text{Cl}_2$  and used as received. A suitable crystal was selected and mounted on a nylon loop using small amount of paratone oil on a Bruker APEX-II CCD diffractometer. The crystal was kept at 173(2) K during data collection. Using Olex2 [1], the structure was solved with the ShelXS [2] structure solution program using Direct Methods and refined with the ShelXL [3] refinement package using Least Squares minimization.

1. Dolomanov, O.V., Bourhis, L.J., Gildea, R.J, Howard, J.A.K. & Puschmann, H. (2009), J. Appl. Cryst. 42, 339-341.
2. Sheldrick, G.M. (2008). Acta Cryst. A64, 112-122.
3. Sheldrick, G.M. (2015). Acta Cryst. C71, 3-8.

## Crystal structure determination of (La(4)<sub>3</sub>(NO<sub>3</sub>)<sub>3</sub>)

**Crystal Data** for C<sub>48</sub>H<sub>39</sub>LaN<sub>3</sub>O<sub>12</sub>P<sub>3</sub>S<sub>3</sub> (*M* = 1177.80 g/mol): trigonal, space group R-3 (no. 148), *a* = 19.720(5) Å, *c* = 11.549(3) Å, *V* = 3890(2) Å<sup>3</sup>, *Z* = 3.00006, *T* = 173(2) K, μ(MoKα) = 1.099 mm<sup>-1</sup>, *D*<sub>calc</sub> = 1.508 g/cm<sup>3</sup>, 9924 reflections measured (4.13° ≤ 2θ ≤ 50.688°), 1595 unique (*R*<sub>int</sub> = 0.0607, *R*<sub>sigma</sub> = 0.0381) which were used in all calculations. The final *R*<sub>1</sub> was 0.0906 (*I* > 2σ(*I*)) and *wR*<sub>2</sub> was 0.2962 (all data).

## Refinement model description

Number of restraints - 168, number of constraints - unknown.

Details:

1. Fixed Uiso

At 1.2 times of:

All C(H) groups

2. Shared sites

{S2, C2}

{S1, C17}

3. Uiso/Uanis restraints and constraints

Uanis(S2) = Uanis(C2)

Uanis(S1) = Uanis(C17)

4. Rigid body (RIGU) restrains

O2, O3, O4, N1

with sigma for 1-2 distances of 0.004 and sigma for 1-3 distances of 0.004

P1, O1, C1, C5, C11, S1, C2, C6, C10, C12, C16, C4, H1, H2, C3, H6, C7, C9,

H10, H12, C13, C15, H16, H4, H3, H7, C8, H9, H13, C14, H15, H8, H14

with sigma for 1-2 distances of 0.004 and sigma for 1-3 distances of 0.004

5. Others

Fixed Sof: O2(0.5) O3(0.5) O4(0.5) N1(0.5) S1(0.42) P1(0.5) O1(0.5) C1(0.5)

C2(0.42) H2(0.42) C3(0.5) H3(0.5) C4(0.5) H4(0.5) C5(0.5) C6(0.5) H6(0.5)

C7(0.5) H7(0.5) C8(0.5) H8(0.5) C9(0.5) H9(0.5) C10(0.5) H10(0.5) C11(0.5)

C12(0.5) H12(0.5) C13(0.5) H13(0.5) C14(0.5) H14(0.5) C15(0.5) H15(0.5)

C16(0.5) H16(0.5) C17(0.08) H1(0.42) S2(0.08)

6.a Riding coordinates:

C17(H1)

6.b Aromatic/amide H refined with riding coordinates:

C2(H2), C3(H3), C4(H4), C6(H6), C7(H7), C8(H8), C9(H9), C10(H10), C12(H12),

C13(H13), C14(H14), C15(H15), C16(H16)

6.c Fitted hexagon refined as free rotating group:

C5(C6,C7,C8,C9,C10), C11(C12,C13,C14,C15,C16)

**Table 1 Crystal data and structure refinement for La(4)<sub>3</sub>(NO<sub>3</sub>)<sub>3</sub>**

|                                                |                                                                                                |
|------------------------------------------------|------------------------------------------------------------------------------------------------|
| CCDC Number                                    | 1846830                                                                                        |
| Empirical formula                              | C <sub>48</sub> H <sub>39</sub> LaN <sub>3</sub> O <sub>12</sub> P <sub>3</sub> S <sub>3</sub> |
| Formula weight                                 | 1177.80                                                                                        |
| Temperature/K                                  | 173(2)                                                                                         |
| Crystal system                                 | trigonal                                                                                       |
| Space group                                    | R-3                                                                                            |
| a/Å                                            | 19.720(5)                                                                                      |
| b/Å                                            | 19.720(5)                                                                                      |
| c/Å                                            | 11.549(3)                                                                                      |
| $\alpha/^\circ$                                | 90                                                                                             |
| $\beta/^\circ$                                 | 90                                                                                             |
| $\gamma/^\circ$                                | 120                                                                                            |
| Volume/Å <sup>3</sup>                          | 3890(2)                                                                                        |
| Z                                              | 3.00006                                                                                        |
| $\rho_{\text{calc}}/\text{cm}^3$               | 1.508                                                                                          |
| $\mu/\text{mm}^{-1}$                           | 1.099                                                                                          |
| F(000)                                         | 1782.0                                                                                         |
| Crystal size/mm <sup>3</sup>                   | 0.256 × 0.247 × 0.157                                                                          |
| Radiation                                      | MoK $\alpha$ ( $\lambda$ = 0.71073)                                                            |
| 2 $\Theta$ range for data collection/ $^\circ$ | 4.13 to 50.688                                                                                 |
| Index ranges                                   | -23 ≤ h ≤ 23, -23 ≤ k ≤ 23, -13 ≤ l ≤ 13                                                       |
| Reflections collected                          | 9924                                                                                           |
| Independent reflections                        | 1595 [ $R_{\text{int}}$ = 0.0607, $R_{\text{sigma}}$ = 0.0381]                                 |
| Data/restraints/parameters                     | 1595/168/186                                                                                   |
| Goodness-of-fit on F <sup>2</sup>              | 1.202                                                                                          |
| Final R indexes [ $I \geq 2\sigma(I)$ ]        | $R_1$ = 0.0906, $wR_2$ = 0.2957                                                                |
| Final R indexes [all data]                     | $R_1$ = 0.0910, $wR_2$ = 0.2962                                                                |
| Largest diff. peak/hole / e Å <sup>-3</sup>    | 1.26/-1.11                                                                                     |

## E. $\text{Sm}(\text{4})(\text{NO}_3)_3$

In this structure, the electron density corresponding to the thienyl rings were disordered. This disorder was modelled over two orientations with a 0.70:0.30 occupancy ratio. Only one part is shown below for clarity. All hydrogen atoms have been omitted for clarity, and atoms are depicted using standard CPK colors (Sm = green). AFIX 66, DFIX and DANG commands were used to give bond lengths and angles that are consistent with literature values. SIMU and DELU commands were used to ensure ellipsoids with reasonable thermal values. The figure on the left depicts the thermal ellipsoids of all atoms; the figure on the right shows the atom numbering scheme for all unique atoms, with the pendant phenyl rings omitted for clarity.

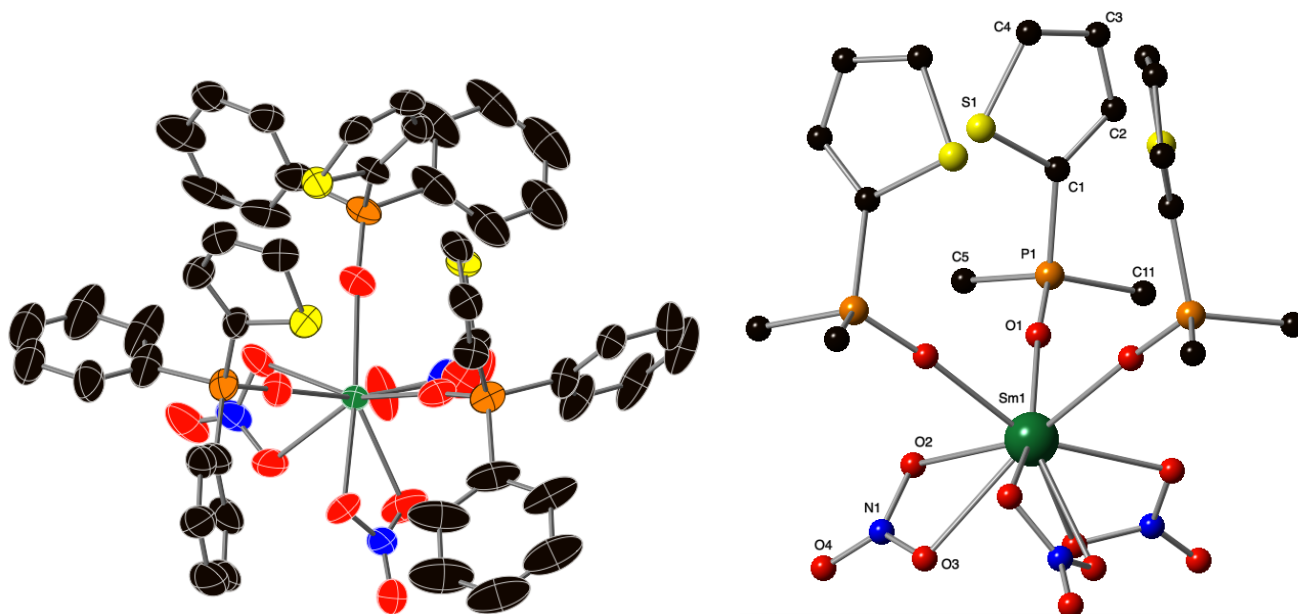

1. Fixed Uiso  
At 1.2 times of:  
All C(H) groups
2. Restrained distances  
S1-C4 = S1-C1  
1.7 with sigma of 0.01  
C3-C4 = C1-C2  
1.34 with sigma of 0.01  
C2-C3  
1.3 with sigma of 0.01
3. Rigid bond restraints  
C1, C2, C3, C4, S1  
with sigma for 1-2 distances of 0.01 and sigma for 1-3 distances of 0.01  
C1A, C2A, C3A, C4A, S1A  
with sigma for 1-2 distances of 0.01 and sigma for 1-3 distances of 0.01  
C11, C12, C13, C14, C15, C16  
with sigma for 1-2 distances of 0.01 and sigma for 1-3 distances of 0.01  
C5, C10, C9, C8, C7, C6  
with sigma for 1-2 distances of 0.01 and sigma for 1-3 distances of 0.01
4. Uiso/Uanis restraints and constraints  
C1 ≈ C2 ≈ C3 ≈ C4 ≈ S1: within 2A with sigma of 0.02 and sigma for terminal atoms of 0.04  
C1A ≈ C2A ≈ C3A ≈ C4A ≈ S1A: within 2A with sigma of 0.02 and sigma for terminal atoms of 0.04  
C11 ≈ C12 ≈ C13 ≈ C14 ≈ C15 ≈ C16: within 2A with sigma of 0.04 and sigma for terminal atoms of 0.08  
C5 ≈ C10 ≈ C9 ≈ C8 ≈ C7 ≈ C6: within 2A with sigma of 0.04 and sigma for terminal atoms of 0.08  
Uanis(C1) = Uanis(C1A)
5. Same fragment restrains  
{C1, C2, C3, C4, S1} sigma for 1-2: 0.01, 1-3: 0.02  
as  
{C1A, C2A, C3A, C4A, S1A}
6. Others  
Fixed Sof: O2(0.5) O3(0.5) O4(0.5) N1(0.5) P1(0.5) O1(0.5) C1(0.35) C2(0.35) H2(0.35) C3(0.35) H3(0.35) C4(0.35) H4(0.35) S1(0.35) C5(0.5) C6(0.5) H6(0.5) C7(0.5) H7(0.5) C8(0.5) H8(0.5) C9(0.5) H9(0.5) C10(0.5) H10(0.5) C11(0.5) C12(0.5) H12(0.5) C13(0.5) H13(0.5) C14(0.5) H14(0.5) C15(0.5) H15(0.5) C16(0.5) H16(0.5) C1A(0.15) C2A(0.15) H2A(0.15) C3A(0.15) H3A(0.15) C4A(0.15) H4A(0.15) S1A(0.15)
- 7.a Aromatic/amide H refined with riding coordinates:  
C2(H2), C3(H3), C4(H4), C6(H6), C7(H7), C8(H8), C9(H9), C10(H10), C12(H12), C13(H13), C14(H14), C15(H15), C16(H16), C2A(H2A), C3A(H3A), C4A(H4A)
- 7.b Fitted hexagon refined as free rotating group:  
C5(C6,C7,C8,C9,C10), C11(C12,C13,C14,C15,C16)

**Table 1 Crystal data and structure refinement for Sm(4)<sub>3</sub>(NO<sub>3</sub>)<sub>3</sub>.**

|                                             |                                                                                                 |
|---------------------------------------------|-------------------------------------------------------------------------------------------------|
| CCDC Number                                 | 1922734                                                                                         |
| Empirical formula                           | C <sub>48</sub> H <sub>39</sub> N <sub>3</sub> O <sub>12</sub> P <sub>3</sub> S <sub>3</sub> Sm |
| Formula weight                              | 1189.24                                                                                         |
| Temperature/K                               | 173(2)                                                                                          |
| Crystal system                              | trigonal                                                                                        |
| Space group                                 | R-3                                                                                             |
| a/Å                                         | 19.608(9)                                                                                       |
| b/Å                                         | 19.608                                                                                          |
| c/Å                                         | 11.469(5)                                                                                       |
| α/°                                         | 90                                                                                              |
| β/°                                         | 90                                                                                              |
| γ/°                                         | 120                                                                                             |
| Volume/Å <sup>3</sup>                       | 3819(4)                                                                                         |
| Z                                           | 3.00006                                                                                         |
| ρ <sub>calc</sub> /g/cm <sup>3</sup>        | 1.551                                                                                           |
| μ/mm <sup>-1</sup>                          | 1.434                                                                                           |
| F(000)                                      | 1797.0                                                                                          |
| Crystal size/mm <sup>3</sup>                | 0.114 × 0.098 × 0.081                                                                           |
| Radiation                                   | MoKα (λ = 0.71073)                                                                              |
| 2θ range for data collection/°              | 4.154 to 50.91                                                                                  |
| Index ranges                                | -23 ≤ h ≤ 23, -23 ≤ k ≤ 23, -13 ≤ l ≤ 13                                                        |
| Reflections collected                       | 10213                                                                                           |
| Independent reflections                     | 1577 [R <sub>int</sub> = 0.0912, R <sub>sigma</sub> = 0.0598]                                   |
| Data/restraints/parameters                  | 1577/191/225                                                                                    |
| Goodness-of-fit on F <sup>2</sup>           | 1.124                                                                                           |
| Final R indexes [I ≥ 2σ (I)]                | R <sub>1</sub> = 0.0769, wR <sub>2</sub> = 0.2368                                               |
| Final R indexes [all data]                  | R <sub>1</sub> = 0.0782, wR <sub>2</sub> = 0.2379                                               |
| Largest diff. peak/hole / e Å <sup>-3</sup> | 1.21/-0.95                                                                                      |

## F. $\text{Pr(4)}_3(\text{NO}_3)_3$

In this structure, we suspect there is some rotational disorder with the thiophene ring (as was seen with the La and Sm structures). However, this disorder seemed to be a very minor component in this case, so we did not model it. Furthermore, the data set already had a poor data/parameter ratio and we did not want to exacerbate this by adding another component. When we attempted to build a model that accounted for this disorder it resulted in a structure with statistically worse refinement values.

All hydrogen atoms have been omitted for clarity, and atoms are depicted using standard CPK colors (Pr = purple). The figure on the left depicts the thermal ellipsoids of all atoms; the figure on the right shows the atom numbering scheme for all unique atoms, with the pendant phenyl rings omitted for clarity.

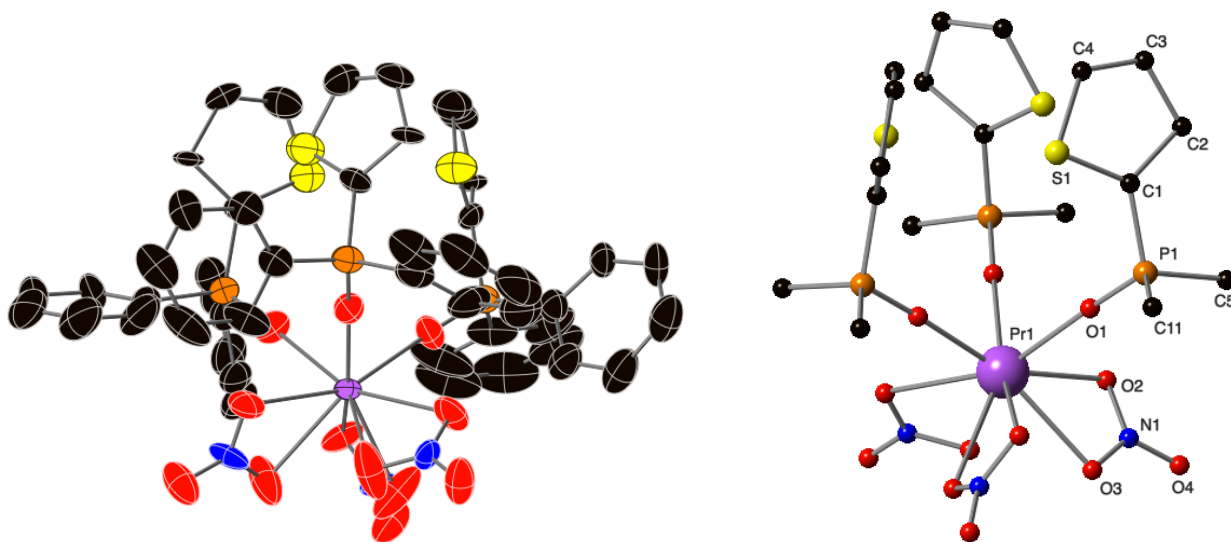

## Experimental

Single crystals of  $\text{C}_{48}\text{H}_{39}\text{N}_3\text{O}_{12}\text{P}_3\text{PrS}_3$  [ $\text{Pr(4)}_3(\text{NO}_3)_3$ ] were grown from slow evaporation of a  $\text{CH}_2\text{Cl}_2/\text{CHCl}_3$  solution and used as received. A suitable crystal was selected and mounted on a nylon loop using a small amount of paratone oil on a Bruker APEX-II CCD diffractometer. The crystal was kept at 173 K during data collection. Using Olex2 [1], the structure was solved with the ShelXT [2] structure solution program using Intrinsic Phasing and refined with the ShelXL [3] refinement package using Least Squares minimization.

1. Dolomanov, O.V., Bourhis, L.J., Gildea, R.J., Howard, J.A.K. & Puschmann, H. (2009), J. Appl. Cryst. 42, 339-341.
2. Sheldrick, G.M. (2015). Acta Cryst. A71, 3-8.
3. Sheldrick, G.M. (2015). Acta Cryst. C71, 3-8.

## Crystal structure determination of $[\text{Pr(4)}_3(\text{NO}_3)_3]$

**Crystal Data** for  $\text{C}_{48}\text{H}_{39}\text{N}_3\text{O}_{12}\text{P}_3\text{PrS}_3$  ( $M=1179.80$  g/mol): trigonal, space group R-3 (no. 148),  $a = 19.836(11)$  Å,  $c = 11.610(6)$  Å,  $V = 3956(5)$  Å<sup>3</sup>,  $Z = 3.00006$ ,  $T = 173.15$  K,  $\mu(\text{MoK}\alpha) = 1.194$  mm<sup>-1</sup>,  $D_{\text{calc}} = 1.486$  g/cm<sup>3</sup>, 7002 reflections measured ( $4.106^\circ \leq 2\theta \leq 52.858^\circ$ ), 1778 unique ( $R_{\text{int}} = 0.0790$ ,  $R_{\text{sigma}} = 0.0660$ ) which were used in all calculations. The final  $R_1$  was 0.0947 ( $I > 2\sigma(I)$ ) and  $wR_2$  was 0.2915 (all data).

## Refinement model description

Number of restraints - 96, number of constraints - unknown.

Details:

1. Fixed Uiso

At 1.2 times of:

All C(H) groups

2. Rigid bond restraints

C5, C10, C9, C8, C7, C6

with sigma for 1-2 distances of 0.01 and sigma for 1-3 distances of 0.01

C11, C12, C13, C14, C15, C16

with sigma for 1-2 distances of 0.01 and sigma for 1-3 distances of 0.01

3. Uiso/Uaniso restraints and constraints

C5  $\approx$  C10  $\approx$  C9  $\approx$  C8  $\approx$  C7  $\approx$  C6: within 2Å with sigma of 0.04

and sigma for terminal atoms of 0.08

C11  $\approx$  C12  $\approx$  C13  $\approx$  C14  $\approx$  C15  $\approx$  C16: within 2Å with sigma of

0.04 and sigma for terminal atoms of 0.08

4. Others

Fixed Sof: S1(0.5) P1(0.5) O1(0.5) O2(0.5) O3(0.5) O4(0.5) N1(0.5) C1(0.5)

C2(0.5) H2(0.5) C3(0.5) H3(0.5) C4(0.5) H4(0.5) C5(0.5) C10(0.5) H10(0.5)

C9(0.5) H9(0.5) C8(0.5) H8(0.5) C7(0.5) H7(0.5) C6(0.5) H6(0.5) C11(0.5)

C12(0.5) H12(0.5) C13(0.5) H13(0.5) C14(0.5) H14(0.5) C15(0.5) H15(0.5)

C16(0.5) H16(0.5)

5.a Aromatic/amide H refined with riding coordinates:

C2(H2), C3(H3), C4(H4), C10(H10), C9(H9), C8(H8), C7(H7), C6(H6), C12(H12),

C13(H13), C14(H14), C15(H15), C16(H16)

5.b Fitted hexagon refined as free rotating group:

C5(C10,C9,C8,C7,C6)

**Table 1 Crystal data and structure refinement for Pr(4)<sub>3</sub>(NO<sub>3</sub>)<sub>3</sub>**

|                                       |                                                                                                |
|---------------------------------------|------------------------------------------------------------------------------------------------|
| CCDC code                             | 1922657                                                                                        |
| Empirical formula                     | C <sub>48</sub> H <sub>39</sub> N <sub>3</sub> O <sub>12</sub> P <sub>3</sub> PrS <sub>3</sub> |
| Formula weight                        | 1179.80                                                                                        |
| Temperature/K                         | 173                                                                                            |
| Crystal system                        | trigonal                                                                                       |
| Space group                           | R-3                                                                                            |
| a/Å                                   | 19.836(11)                                                                                     |
| b/Å                                   | 19.836(11)                                                                                     |
| c/Å                                   | 11.610(6)                                                                                      |
| $\alpha$ /°                           | 90                                                                                             |
| $\beta$ /°                            | 90                                                                                             |
| $\gamma$ /°                           | 120                                                                                            |
| Volume/Å <sup>3</sup>                 | 3956(5)                                                                                        |
| Z                                     | 3.00006                                                                                        |
| $\rho_{\text{calc}}$ /cm <sup>3</sup> | 1.486                                                                                          |
| $\mu$ /mm <sup>-1</sup>               | 1.194                                                                                          |
| F(000)                                | 1788.0                                                                                         |
| Crystal size/mm <sup>3</sup>          | 0.23 $\times$ 0.213 $\times$ 0.166                                                             |
| Radiation                             | MoK $\alpha$ ( $\lambda$ = 0.71073)                                                            |

$2\theta$  range for data collection/ $^{\circ}$  4.106 to 52.858  
 Index ranges  $-22 \leq h \leq 22, -24 \leq k \leq 24, -12 \leq l \leq 14$   
 Reflections collected 7002  
 Independent reflections 1778 [ $R_{\text{int}} = 0.0790, R_{\text{sigma}} = 0.0660$ ]  
 Data/restraints/parameters 1778/96/198  
 Goodness-of-fit on  $F^2$  1.157  
 Final R indexes [ $I \geq 2\sigma(I)$ ]  $R_1 = 0.0947, wR_2 = 0.2897$   
 Final R indexes [all data]  $R_1 = 0.0964, wR_2 = 0.2915$   
 Largest diff. peak/hole /  $e \text{ \AA}^{-3}$  1.09/-1.15

## G. $\text{Tb}(\mathbf{4})_3(\text{NO}_3)_3(\text{C}_6\text{H}_6)$

The electron density for this structure was very disordered and was modeled as both rotational and positional isomers of the thienyl ring. The carbon atoms were left as isotropic in the final structure. In the figure below all hydrogen atoms have been omitted for clarity, and atoms are depicted using standard CPK colors (Tb = purple). The figure on the left depicts the thermal ellipsoids the Tb, O, N, P, and S atoms (50% probability); the figure on the right shows the atom numbering scheme for all atoms, with the pendant phenyl rings and solvent benzene molecule omitted for clarity.

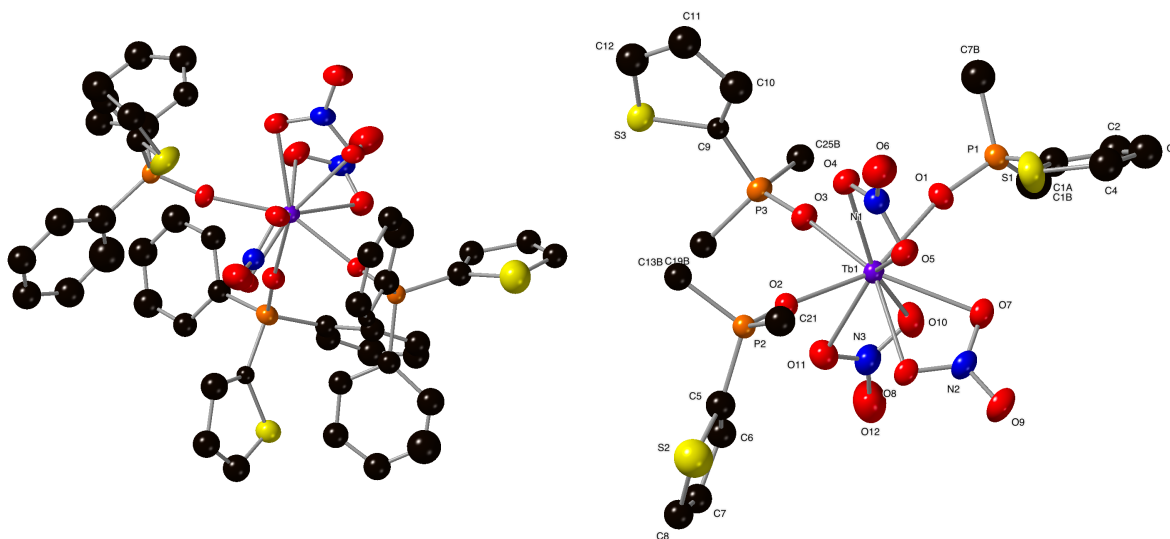

Diffraction, 2020) Numerical absorption correction based on gaussian integration over a multifaceted crystal model  
Empirical absorption correction using spherical harmonics, implemented in SCALE3 ABSPACK scaling algorithm.

The structure was solved in the space group *Pbca* (# 61) by using dual methods using the ShelXT (Sheldrick, 2015) structure solution program. The structure was refined by Least Squares using version 2018/2 of XL (Sheldrick, 2008) incorporated in Olex2 (Dolomanov et al., 2009). All non-hydrogen atoms were refined anisotropically. Hydrogen atom positions were calculated geometrically and refined using the riding model, except for the hydrogen atom on the non-carbon atom(s) which were found by difference Fourier methods and refined isotropically when data permits.

There is a single molecule in the asymmetric unit, which is represented by the reported sum formula. In other words: Z is 8 and Z' is 1.

## Citations

CrysAlisPro (Rigaku, V1.171.40.84a, 2020)

O.V. Dolomanov and L.J. Bourhis and R.J. Gildea and J.A.K. Howard and H. Puschmann, Olex2: A complete structure solution, refinement and analysis program, *J. Appl. Cryst.*, (2009), **42**, 339-341.

Sheldrick, G.M., Crystal structure refinement with ShelXL, *Acta Cryst.*, (2015), **C71**, 3-8.

Sheldrick, G.M., ShelXT-Integrated space-group and crystal-structure determination, *Acta Cryst.*, (2015), **A71**, 3-8.

**Crystal Data.**  $C_{54}H_{45}N_3O_{12}P_3S_3Tb$ ,  $M_r = 1275.94$ , orthorhombic, *Pbca* (No. 61),  $a = 20.75550(10) \text{ \AA}$ ,  $b = 17.56580(10) \text{ \AA}$ ,  $c = 30.25370(10) \text{ \AA}$ ,  $\alpha = \beta = \gamma 90^\circ$ ,  $V = 11030.10(9) \text{ \AA}^3$ ,  $T = 100.00(10) \text{ K}$ ,  $Z = 8$ ,  $Z' = 1$ ,  $\mu(\text{Cu K}\alpha) = 8.725$ , 88674 reflections measured, 11654 unique ( $R_{\text{int}} = 0.0353$ ) which were used in all calculations. The final  $wR_2$  was 0.1640 (all data) and  $R_I$  was 0.0608 ( $I \geq 2 \sigma(I)$ ).

|                              |                                                                                                 |
|------------------------------|-------------------------------------------------------------------------------------------------|
| <b>Compound</b>              | <b>Tb(4)<sub>3</sub>(NO<sub>3</sub>)<sub>3</sub>(C<sub>6</sub>H<sub>6</sub>)</b>                |
| CCDC number                  | 2173564                                                                                         |
| Formula                      | C <sub>54</sub> H <sub>45</sub> N <sub>3</sub> O <sub>12</sub> P <sub>3</sub> S <sub>3</sub> Tb |
| $D_{calc.}/\text{g cm}^{-3}$ | 1.537                                                                                           |
| $\mu/\text{mm}^{-1}$         | 8.725                                                                                           |
| Formula Weight               | 1275.94                                                                                         |
| Colour                       | colourless                                                                                      |
| Shape                        | irregular                                                                                       |
| Size/mm <sup>3</sup>         | 0.24×0.10×0.08                                                                                  |
| $T/\text{K}$                 | 100.00(10)                                                                                      |
| Crystal System               | orthorhombic                                                                                    |
| Space Group                  | <i>Pbca</i>                                                                                     |
| $a/\text{\AA}$               | 20.75550(10)                                                                                    |
| $b/\text{\AA}$               | 17.56580(10)                                                                                    |
| $c/\text{\AA}$               | 30.25370(10)                                                                                    |
| $\alpha/^\circ$              | 90                                                                                              |
| $\beta/^\circ$               | 90                                                                                              |
| $\gamma/^\circ$              | 90                                                                                              |
| $V/\text{\AA}^3$             | 11030.10(9)                                                                                     |
| $Z$                          | 8                                                                                               |
| $Z'$                         | 1                                                                                               |
| Wavelength/ $\text{\AA}$     | 1.54184                                                                                         |
| Radiation type               | Cu K $\alpha$                                                                                   |
| $\theta_{min}/^\circ$        | 3.606                                                                                           |
| $\theta_{max}/^\circ$        | 77.659                                                                                          |
| Measured Refl's.             | 88674                                                                                           |
| Indep't Refl's               | 11654                                                                                           |
| Refl's $I \geq 2 \sigma(I)$  | 10855                                                                                           |
| $R_{int}$                    | 0.0353                                                                                          |
| Parameters                   | 452                                                                                             |
| Restraints                   | 65                                                                                              |
| Largest Peak                 | 1.730                                                                                           |
| Deepest Hole                 | -2.214                                                                                          |
| GooF                         | 1.076                                                                                           |
| $wR_2$ (all data)            | 0.1640                                                                                          |
| $wR_2$                       | 0.1612                                                                                          |
| $R_1$ (all data)             | 0.0636                                                                                          |
| $R_1$                        | 0.0608                                                                                          |

## H. $\text{Er(4)}_3(\text{NO}_3)_3(\text{C}_6\text{H}_6)$

The electron density for this structure was very disordered and was modeled as both rotational and positional isomers of the thienyl ring. The carbon atoms were left as isotropic in the final structure. In the figure below all hydrogen atoms have been omitted for clarity, and atoms are depicted using standard CPK colors (Er = mocha). The figure on the left depicts the thermal ellipsoids of the Er, O, N, P and S atoms (50% probability); the figure on the right shows the atom numbering scheme using a ball and stick model, with the pendant phenyl rings and solvent benzene molecule omitted for clarity.

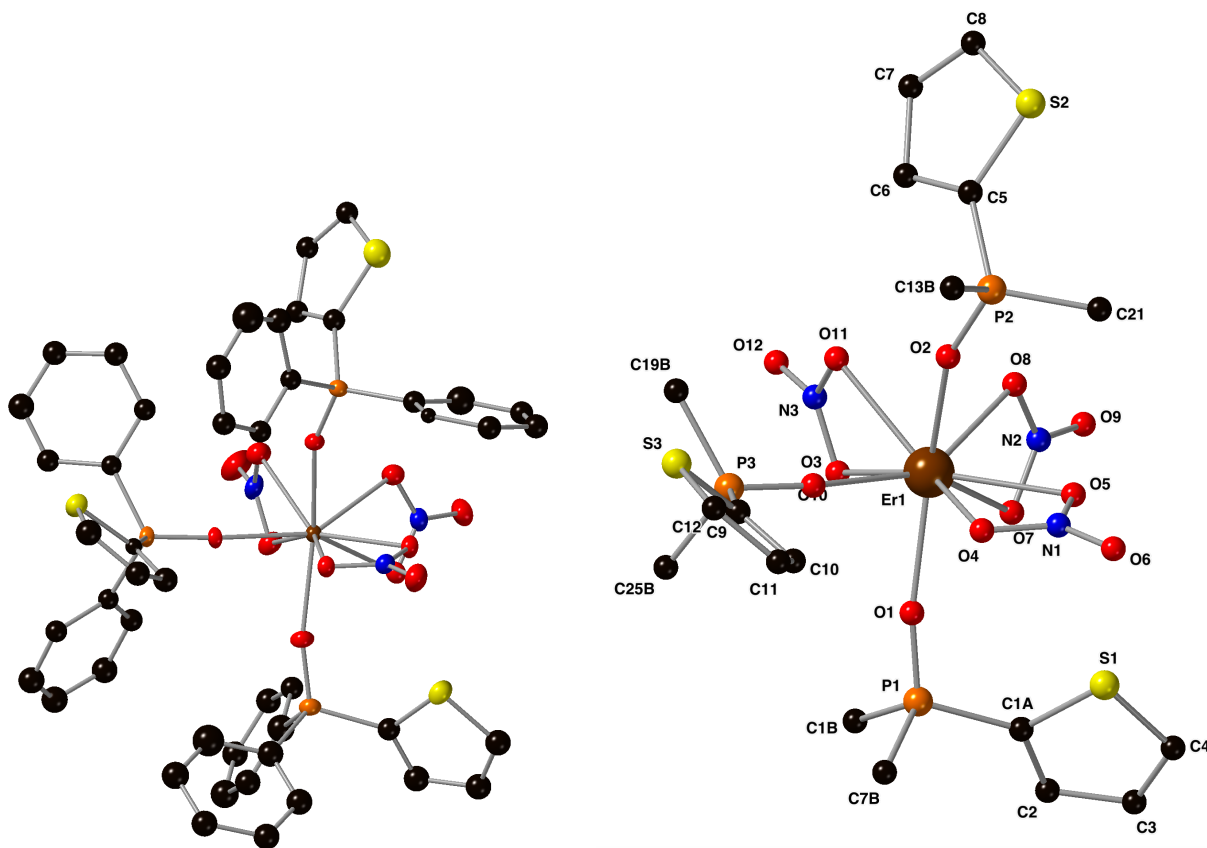

### Experimental.

Single colourless irregular crystals of  $[\text{Er(4)}_3(\text{NO}_3)_3(\text{C}_6\text{H}_6)]$  were grown by vapor diffusion of benzene into acetonitrile and used as received. A suitable crystal with dimensions  $0.19 \times 0.12 \times 0.07 \text{ mm}^3$  was selected and mounted on a nylon loop with paratone oil on a XtaLAB Synergy, Dualflex, HyPix diffractometer. The crystal was kept at a steady  $T = 100.00(10) \text{ K}$  during data collection. The structure was solved with the **ShelXT** (Sheldrick, G.M. (2015). Acta Cryst. A71, 3-8) solution program using dual methods and by using **O. V. Dolomanov, L. J. Bourhis, R. J. Gildea, J. A. K. Howard and H. Puschmann, Olex2: a complete structure solution, refinement and analysis program.** J. Appl. Cryst. (2009). 42, 339-341. as the graphical interface. The model was refined with **ShelXL** (Sheldrick, Acta Cryst. A64 2008, 112-122) using full matrix least squares minimisation on  $F^2$ .

**Crystal Data.**  $\text{C}_{54}\text{H}_{45}\text{ErN}_3\text{O}_{12}\text{P}_3\text{S}_3$ ,  $M_r = 1284.28$ , orthorhombic, *Pbca* (No. 61),  $a = 20.75560(10) \text{ \AA}$ ,  $b = 17.56230(10) \text{ \AA}$ ,  $c = 30.2522(2) \text{ \AA}$ ,  $\alpha = \beta = \gamma = 90^\circ$ ,  $V = 11027.41(11) \text{ \AA}^3$ ,  $T = 100.00(10) \text{ K}$ ,  $Z = 8$ ,  $Z' = 1$ ,  $\mu(\text{Cu K}\alpha) = 5.245$ , 89327 reflections measured, 11680 unique ( $R_{\text{int}} = 0.0386$ ) which were used in all calculations. The final  $wR_2$  was 0.1738 (all data) and  $R_1$  was 0.0686 ( $I \geq 2 \sigma(I)$ ).

## Citations.

CrysAlisPro (Rigaku, V1.171.41.90a, 2020)

O.V. Dolomanov and L.J. Bourhis and R.J. Gildea and J.A.K. Howard and H. Puschmann, Olex2: A complete structure solution, refinement and analysis program, *J. Appl. Cryst.*, (2009), **42**, 339-341.

Sheldrick, G.M., Crystal structure refinement with ShelXL, *Acta Cryst.*, (2015), **C71**, 3-8.

Sheldrick, G.M., ShelXT-Integrated space-group and crystal-structure determination, *Acta Cryst.*, (2015), **A71**, 3-8.

A colourless irregular-shaped crystal with dimensions  $0.19 \times 0.12 \times 0.07$  mm<sup>3</sup> was mounted on a nylon loop with paratone oil. Data were collected using a XtaLAB Synergy, Dualflex, HyPix diffractometer equipped with an Oxford Cryosystems low-temperature device, operating at  $T = 100.00(10)$  K.

Data were measured using  $\omega$  scans of  $0.5^\circ$  per frame for 1.0/4.1 s using Cu K $\alpha$  radiation (micro-focus sealed X-ray tube, 50 kV, 1 mA). The total number of runs and images was based on the strategy calculation from the program CrysAlisPro (Rigaku, V1.171.41.90a, 2020). The actually achieved resolution was  $\theta = 77.665$ .

Cell parameters were retrieved using the CrysAlisPro (Rigaku, V1.171.41.90a, 2020) software and refined using CrysAlisPro (Rigaku, V1.171.41.90a, 2020) on 43288 reflections, 48 % of the observed reflections. Data reduction was performed using the CrysAlisPro (Rigaku, V1.171.41.90a, 2020) software which corrects for Lorentz polarization. The final completeness is 100.00 out to 77.665 in  $\theta$  CrysAlisPro 1.171.41.90a (Rigaku Oxford Diffraction, 2020) Numerical absorption correction based on gaussian integration over a multifaceted crystal model Empirical absorption correction using spherical harmonics, implemented in SCALE3 ABSPACK scaling algorithm.

The structure was solved in the space group *Pbca* (# 61) by using dual methods using the ShelXT (Sheldrick, G.M. (2015). *Acta Cryst.* A71, 3-8) structure solution program. The structure was refined by Least Squares using version 2018/2 of XL (Sheldrick, 2008) incorporated in Olex2 (Dolomanov et al., 2009). All non-hydrogen atoms were refined anisotropically. Hydrogen atom positions were calculated geometrically and refined using the riding model, except for the hydrogen atom on the non-carbon atom(s) which were found by difference Fourier methods and refined isotropically when data permits.

There is a single molecule in the asymmetric unit, which is represented by the reported sum formula. In other words: Z is 8 and Z' is 1.

|                              |                                                                                                |
|------------------------------|------------------------------------------------------------------------------------------------|
| <b>Compound</b>              | <b>Er(4)<sub>3</sub>(NO<sub>3</sub>)<sub>3</sub>(C<sub>6</sub>H<sub>6</sub>)</b>               |
| CCDC number                  | 2173657                                                                                        |
| Formula                      | C <sub>54</sub> H <sub>45</sub> ErN <sub>3</sub> O <sub>12</sub> P <sub>3</sub> S <sub>3</sub> |
| $D_{calc.}/\text{g cm}^{-3}$ | 1.547                                                                                          |
| $\mu/\text{mm}^{-1}$         | 5.245                                                                                          |
| Formula Weight               | 1284.28                                                                                        |
| Colour                       | colourless                                                                                     |
| Shape                        | irregular                                                                                      |
| Size/mm <sup>3</sup>         | 0.19×0.12×0.07                                                                                 |
| $T/\text{K}$                 | 100.00(10)                                                                                     |
| Crystal System               | orthorhombic                                                                                   |
| Space Group                  | <i>Pbca</i>                                                                                    |
| $a/\text{\AA}$               | 20.75560(10)                                                                                   |
| $b/\text{\AA}$               | 17.56230(10)                                                                                   |
| $c/\text{\AA}$               | 30.2522(2)                                                                                     |
| $\alpha/^\circ$              | 90                                                                                             |
| $\beta/^\circ$               | 90                                                                                             |
| $\gamma/^\circ$              | 90                                                                                             |
| $V/\text{\AA}^3$             | 11027.41(11)                                                                                   |
| $Z$                          | 8                                                                                              |
| $Z'$                         | 1                                                                                              |
| Wavelength/ $\text{\AA}$     | 1.54184                                                                                        |
| Radiation type               | Cu K $\alpha$                                                                                  |
| $\theta_{min}/^\circ$        | 2.921                                                                                          |
| $\theta_{max}/^\circ$        | 77.665                                                                                         |
| Measured Refl's.             | 89327                                                                                          |
| Indep't Refl's               | 11680                                                                                          |
| Refl's $I \geq 2 \sigma(I)$  | 10842                                                                                          |
| $R_{int}$                    | 0.0386                                                                                         |
| Parameters                   | 452                                                                                            |
| Restraints                   | 65                                                                                             |
| Largest Peak                 | 1.860                                                                                          |
| Deepest Hole                 | -2.279                                                                                         |
| GooF                         | 1.038                                                                                          |
| $wR_2$ (all data)            | 0.1738                                                                                         |
| $wR_2$                       | 0.1712                                                                                         |
| $R_1$ (all data)             | 0.0722                                                                                         |
| $R_1$                        | 0.0686                                                                                         |

## I. Tb(4)(OTf)<sub>3</sub>

In this structure, the electron density corresponding to two of the thienyl rings, one coordinated triflate and the outer sphere triflate anion were disordered. This disorder was modelled over two orientations with a 50:50 and 33:67 occupancy ratio. DFIX, DANG and SAME commands were used to ensure bond lengths consistent with accepted values, and SIMU, DELU and EADP commands were used to ensure reasonable thermal values. In the figures below, only one part is shown below for clarity. All hydrogen atoms have been omitted for clarity, and atoms are depicted using standard CPK colors (Tb = purple). The figure on the left shows all atoms as thermal ellipsoids at the 30% probability level; the figure on the right omits the pendant phenyl groups and uncoordinated triflate anion, and shows the atom numbering scheme using a ball and stick model.

We suspect that there is additional positional disorder of the thienyl rings present in this structure (meaning: some thienyl rings may be disordered with a phenyl ring of the parent phosphine ligand). This is supported by thermal values for carbon atoms on adjacent benzene rings that are smaller than their neighbors. The residual electron density present from this disorder is minimal. We have chosen not to model the positional disorder of the thienyl rings because it is minimal and because we'd rather maintain a higher data to parameter ratio.

The intensity contribution of additional disordered electron density was removed using the BYPASS<sup>1</sup> command as implemented in OLEX2.<sup>2</sup> We suspect that this electron density corresponds to one molecule of toluene that is rotationally disordered on a symmetry site. The space is located at average x,y,z coordinates of [0.500, 0.000, 0.000], has a calculated volume of 176.2 Å<sup>3</sup> and contains approximately 44.5 electrons.

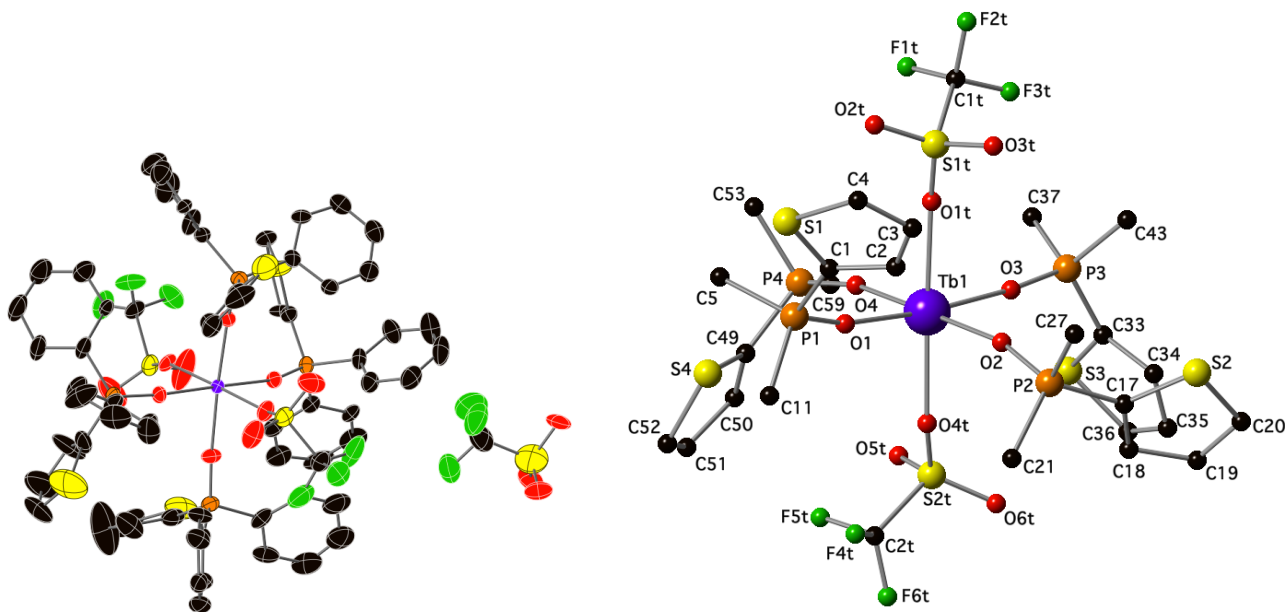

## Experimental

Single crystals of C<sub>67</sub>H<sub>52</sub>F<sub>9</sub>O<sub>13</sub>P<sub>4</sub>S<sub>7</sub>Tb [Tb(4)(OTf)<sub>3</sub>] were grown by vapor diffusion of toluene/hexane into a solution of the complex. A suitable crystal was selected and mounted on a nylon loop using a small amount of paratone oil on a Bruker APEX-II CCD diffractometer. The crystal was kept at 173(2) K during data collection.

Using Olex2 [2], the structure was solved with the ShelXT [3] structure solution program using Intrinsic Phasing and refined with the ShelXL [4] refinement package using Least Squares minimization.

1. van der Sluis, P.; Spek, A. L., "BYPASS: an effective method for the refinement of crystal structures containing disordered solvent regions". *Acta Cryst.* **1990**, *A46*, 194-201.
2. Dolomanov, O.V., Bourhis, L.J., Gildea, R.J., Howard, J.A.K. & Puschmann, H. (2009), *J. Appl. Cryst.* **42**, 339-341.
3. Sheldrick, G.M. (2015). *Acta Cryst.* **A71**, 3-8.
4. Sheldrick, G.M. (2015). *Acta Cryst.* **C71**, 3-8.

### Crystal structure determination of [Tb(4)<sub>4</sub>(OTf)<sub>3</sub>]

**Crystal Data** for C<sub>67</sub>H<sub>52</sub>F<sub>9</sub>O<sub>13</sub>P<sub>4</sub>S<sub>7</sub>Tb (*M*=1743.30 g/mol): triclinic, space group P-1 (no. 2), *a* = 13.7126(11) Å, *b* = 14.5867(12) Å, *c* = 19.8641(17) Å,  $\alpha$  = 86.1680(10)°,  $\beta$  = 71.5830(10)°,  $\gamma$  = 89.4960(10)°, *V* = 3761.0(5) Å<sup>3</sup>, *Z* = 2, *T* = 173.15 K,  $\mu$ (MoK $\alpha$ ) = 1.300 mm<sup>-1</sup>, *D*<sub>calc</sub> = 1.539 g/cm<sup>3</sup>, 61327 reflections measured (3.13° ≤ 2 $\theta$  ≤ 50.806°), 13819 unique (*R*<sub>int</sub> = 0.0467, *R*<sub>sigma</sub> = 0.0410) which were used in all calculations. The final *R*<sub>1</sub> was 0.0537 (*I* > 2 $\sigma$ (*I*)) and *wR*<sub>2</sub> was 0.1563 (all data).

### Refinement model description

Number of restraints - 349, number of constraints - unknown.

Details:

1. Fixed Uiso

At 1.2 times of:

All C(H) groups

2. Restrained distances

S1-C1 = S1-C4

1.7 with sigma of 0.01

C4-C3 = C2-C1

1.34 with sigma of 0.01

C3-C2

1.3 with sigma of 0.01

P3-C33A

1.78 with sigma of 0.01

P3-S3A

3 with sigma of 0.01

3. Restrained planarity

C17, S2, C20, C19, C18

with sigma of 0.1

C49, S4, C52, C51, C50

with sigma of 0.1

C49A, C50A, C51A, C52A, S4A

with sigma of 0.1

C33A, C34A, C36A, C35A, S3A, P3

with sigma of 0.1

S3, C33, C34, C35, C36

with sigma of 0.1

4. Rigid bond restraints

C33, S3, C36, C35, C34

with sigma for 1-2 distances of 0.01 and sigma for 1-3 distances of 0.01

C33A, C34A, C35A, C36A, S3A

with sigma for 1-2 distances of 0.01 and sigma for 1-3 distances of 0.01

C49A, C50A, C51A, C52A, S4A

with sigma for 1-2 distances of 0.02 and sigma for 1-3 distances of 0.04  
C49, S4, C52, C51, C50

with sigma for 1-2 distances of 0.01 and sigma for 1-3 distances of 0.01  
C17, C18, C19, C20, S2

with sigma for 1-2 distances of 0.01 and sigma for 1-3 distances of 0.02  
C33A, S3A, C36A, C35A, C34A

with sigma for 1-2 distances of 0.01 and sigma for 1-3 distances of 0.01  
C3T, F7T, F8T, F9T

with sigma for 1-2 distances of 0.01 and sigma for 1-3 distances of 0.01  
C2R, F4R, F5R, F6R

with sigma for 1-2 distances of 0.01 and sigma for 1-3 distances of 0.01  
5. Uiso/Uanis restraints and constraints

C49A  $\approx$  C50A  $\approx$  C51A  $\approx$  C52A  $\approx$  S4A: within 2A with sigma of 0.01  
and sigma for terminal atoms of 0.02

C17  $\approx$  C18  $\approx$  C19  $\approx$  C20  $\approx$  S2: within 2A with sigma of 0.02 and  
sigma for terminal atoms of 0.04

C2R  $\approx$  F4R  $\approx$  F5R  $\approx$  F6R: within 2A with sigma of 0.04 and sigma for  
terminal atoms of 0.08

Uanis(C34A) = Uanis(C34)

Uanis(C50) = Uanis(C50A)

Uanis(C33A) = Uanis(C33)

Uanis(C49) = Uanis(C49A)

6. Same fragment restrains

{S1, C1, C2, C3, C4} sigma for 1-2: 0.02, 1-3: 0.04

as

{S2, C17, C18, C19, C20}

{S1, C1, C2, C3, C4} sigma for 1-2: 0.01, 1-3: 0.02

as

{S3, C33, C34, C35, C36}

{S1, C1, C2, C3, C4} sigma for 1-2: 0.02, 1-3: 0.04

as

{S3A, C33A, C34A, C35A, C36A}

{S1, C1, C2, C3, C4} sigma for 1-2: 0.02, 1-3: 0.04

as

{S4, C49, C50, C51, C52}

{S1, C1, C2, C3, C4} sigma for 1-2: 0.02, 1-3: 0.04

as

{S4A, C49A, C50A, C51A, C52A}

{S1T, O1T, O2T, O3T, C1T, F1T, F2T, F3T} sigma for 1-2: 0.01, 1-3: 0.02

as

{S2T, O4T, O5T, O6T, C2T, F4T, F5T, F6T}

{S1T, O1T, O2T, O3T, C1T, F1T, F2T, F3T} sigma for 1-2: 0.02, 1-3: 0.04

as

{S2R, O4R, O5R, O6R, C2R, F4R, F5R, F6R}

{C1T, F1T, F2T, F3T} sigma for 1-2: 0.02, 1-3: 0.04

as

{C3T, F7T, F8T, F9T}

{S3T, O7T, O8T, O9T, C3T, F7T, F8T, F9T} sigma for 1-2: 0.02, 1-3: 0.04

as

{S3R, O7R, O8R, O9R, C3R, F7R, F8R, F9R}

7. Others

Fixed Sof: S3(0.66667) C33(0.66667) C34(0.66667) H34(0.66667) C35(0.66667)  
H35(0.66667) C36(0.66667) H36(0.66667) S3A(0.33333) C33A(0.33333)  
C34A(0.33333) H34A(0.33333) C35A(0.33333) H35A(0.33333) C36A(0.33333)  
H36A(0.33333) S4(0.5) C49(0.5) C50(0.5) H50(0.5) C51(0.5) H51(0.5) C52(0.5)  
H52(0.5) S4A(0.5) C49A(0.5) C50A(0.5) H50A(0.5) C51A(0.5) H51A(0.5) C52A(0.5)  
H52A(0.5) S2T(0.5) O4T(0.5) O5T(0.5) O6T(0.5) C2T(0.5) F4T(0.5) F5T(0.5)  
F6T(0.5) S2R(0.5) O4R(0.5) O5R(0.5) O6R(0.5) C2R(0.5) F4R(0.5) F5R(0.5)  
F6R(0.5) S3T(0.5) O7T(0.5) O8T(0.5) O9T(0.5) C3T(0.5) F7T(0.5) F8T(0.5)  
F9T(0.5) S3R(0.5) O7R(0.5) O8R(0.5) O9R(0.5) C3R(0.5) F7R(0.5) F8R(0.5)  
F9R(0.5)

8.Aromatic/amide H refined with riding coordinates:

C2(H2), C3(H3), C4(H4), C6(H6), C7(H7), C8(H8), C9(H9), C10(H10), C12(H12),  
C13(H13), C14(H14), C15(H15), C16(H16), C18(H18), C19(H19), C20(H20), C22(H22),  
C23(H23), C24(H24), C25(H25), C26(H26), C28(H28), C29(H29), C30(H30),  
C31(H31), C32(H32), C34(H34), C35(H35), C36(H36), C34A(H34A), C35A(H35A),  
C36A(H36A), C38(H38), C39(H39), C40(H40), C41(H41), C42(H42), C44(H44),  
C45(H45), C46(H46), C47(H47), C48(H48), C50(H50), C51(H51), C52(H52),  
C50A(H50A), C51A(H51A), C52A(H52A), C54(H54), C55(H55), C56(H56), C57(H57),  
C58(H58), C60(H60), C61(H61), C62(H62), C63(H63), C64(H64)

**Table 1 Crystal data and structure refinement for Tb(4)<sub>4</sub>(OTf)<sub>3</sub>.**

|                                    |                                                                                                 |
|------------------------------------|-------------------------------------------------------------------------------------------------|
| CCDC Number                        | 1850479                                                                                         |
| Empirical formula                  | C <sub>67</sub> H <sub>52</sub> F <sub>9</sub> O <sub>13</sub> P <sub>4</sub> S <sub>7</sub> Tb |
| Formula weight                     | 1743.30                                                                                         |
| Temperature/K                      | 173(2)                                                                                          |
| Crystal system                     | triclinic                                                                                       |
| Space group                        | P-1                                                                                             |
| a/Å                                | 13.7126(11)                                                                                     |
| b/Å                                | 14.5867(12)                                                                                     |
| c/Å                                | 19.8641(17)                                                                                     |
| α/°                                | 86.1680(10)                                                                                     |
| β/°                                | 71.5830(10)                                                                                     |
| γ/°                                | 89.4960(10)                                                                                     |
| Volume/Å <sup>3</sup>              | 3761.0(5)                                                                                       |
| Z                                  | 2                                                                                               |
| ρ <sub>calc</sub> /cm <sup>3</sup> | 1.539                                                                                           |
| μ/mm <sup>-1</sup>                 | 1.300                                                                                           |
| F(000)                             | 1752.0                                                                                          |
| Crystal size/mm <sup>3</sup>       | 0.324 × 0.193 × 0.126                                                                           |
| Radiation                          | MoKα (λ = 0.71073)                                                                              |
| 2θ range for data collection/°     | 3.13 to 50.806                                                                                  |
| Index ranges                       | -16 ≤ h ≤ 16, -17 ≤ k ≤ 17, -23 ≤ l ≤ 23                                                        |
| Reflections collected              | 61327                                                                                           |
| Independent reflections            | 13819 [R <sub>int</sub> = 0.0467, R <sub>sigma</sub> = 0.0410]                                  |
| Data/restraints/parameters         | 13819/349/1120                                                                                  |

Goodness-of-fit on  $F^2$  1.060  
 Final R indexes [ $I \geq 2\sigma(I)$ ]  $R_1 = 0.0537$ ,  $wR_2 = 0.1459$   
 Final R indexes [all data]  $R_1 = 0.0636$ ,  $wR_2 = 0.1563$   
 Largest diff. peak/hole /  $e \text{ \AA}^{-3}$  1.68/-1.36

**Solvent masks information for  $\text{Tb(4)}_4(\text{OTF})_3$ .**

| Number | X     | Y     | Z     | Volume | Electron count | Content     |
|--------|-------|-------|-------|--------|----------------|-------------|
| 1      | 0.500 | 0.000 | 0.000 | 176.2  | 44.5           | toluene (?) |

Ph<sub>2</sub>P(S)

proton pure Mg<sub>2</sub>Se<sub>6</sub>

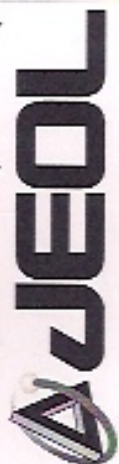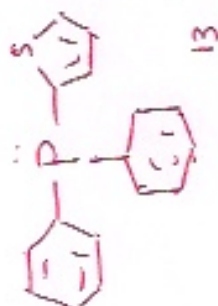

13

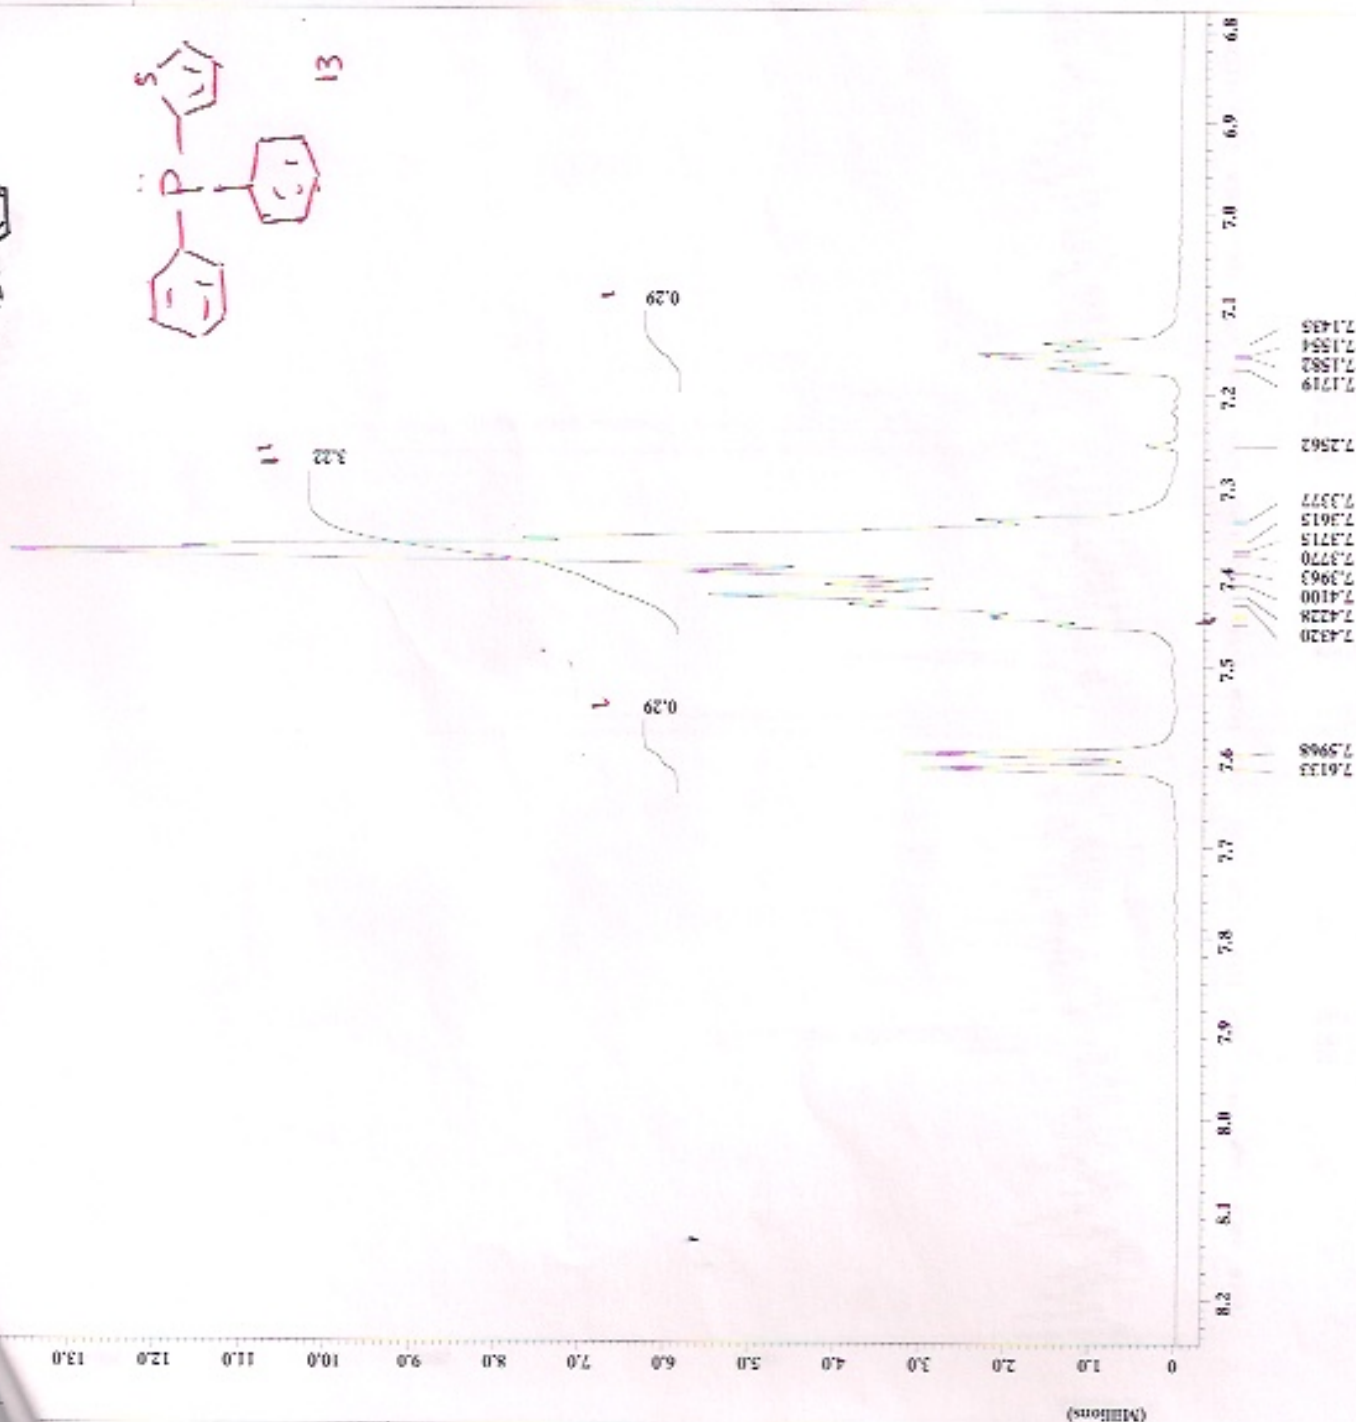

=====  
 File name = T1.phos A\_CDCL3-4.1d  
 Author = benderj\_lab  
 Experiment = single\_pulse.exp  
 Sample\_id = NO-1-5  
 Solvent = CHLOROFORM-D  
 Creation\_time = 22-MAY-2006 01:53:21  
 Revision\_time = 19-MAY-2016 11:23:43  
 Current\_time = 19-MAY-2016 11:23:54  
 =====  
 Comment = Single Pulse Experiment  
 Data\_format = 1D\_COMPLEX  
 Bin\_size = 16384  
 Bin\_title = 13  
 Bin\_units = (ppm)  
 Observations = X  
 Site = Eclipse-300  
 Spectrometer = ECLIPSE-300  
 =====  
 Field\_strength = 7.0556013(7) 1300 (MHz)  
 X\_acq\_duration = 3.5319712(s)  
 X\_dosize = 1K  
 X\_freq = 300.52965492 (MHz)  
 X\_offset = 5(ppm)  
 X\_points = 16384  
 X\_prescan = 0  
 X\_resolution = 0.37518105 (Hz)  
 X\_sweep = 4.5085628 (kHz)  
 Clipped = FALSE  
 Mod\_return = 1  
 Scans = 16  
 Total\_scans = 16  
 =====  
 X\_f0\_width = 15.32(us)  
 X\_acq\_time = 3.6339712(s)  
 X\_angle = 45(deg)  
 X\_pulse = 7.66(us)  
 Initial\_wait = 1(s)  
 Phase\_preset = 3(us)  
 Svcvr\_gain = 18  
 Relaxation\_delay = 4(s)  
 Vesp\_get = 21.3(dc)  
 Unblank\_time = 2(us)

Ph<sub>2</sub>P-65

Carbon Pure May 18, 2010

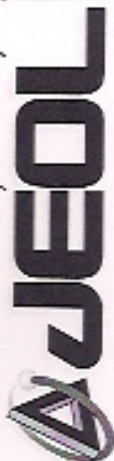

# File Name

Author

Experiment

Sample ID

Solvent

Creation Time

Revision Time

Current Time

Comment

Data Format

Dir Size

Dir Title

Dir Units

Dimensions

Site

Spectrometer

Field Strength

X\_acq\_duration

X\_domain

X\_freq

X\_offset

X\_points

X\_prescans

X\_resolution

X\_sweep

Irr\_domain

Irr\_freq

Irr\_offset

Clipped

Mod\_return

Scans

Total\_scans

X\_90\_width

X\_acq\_time

X\_angle

X\_pulse

Initial\_wait

Phase\_presc

Recvr\_gain

Relaxation\_delay

Temp\_get

Outlock\_time

= TL phos A C02A3-2.JDI

= bender1.lab

= single\_pulse.doc

= 8447384

= CHLOROFORM-D

= 22-MAY-2003 04:23:43

= 19-MAY-2015 12:54:16

= 19-MAY-2015 12:54:25

= Single Pulse with Bco

= 1D COMPLEX

= 32768

= 13C

= (ppm)

= K

= Eclipse+ 300

= DELTA\_RMR

= 7.0486013171 1300 (MHz)

= 1.7334272 (s)

= 13C

= 75.56823426 (MHz)

= 100 (ppm)

= 32768

= 4

= 0.57689184 (Hz)

= 16.90339158 (MHz)

= 16

= 300.32955392 (MHz)

= 5 (ppm)

= FALSE

= 1

= 503

= 503

= 10.86 (us)

= 1.7334272 (s)

= 30 (deg)

= 3.62 (us)

= 1 (s)

= 3 (us)

= 30

= 1 (s)

= 22.1 (deg)

= 2 (us)

(Thousands)

150.0 140.0 130.0 120.0 110.0 100.0 90.0 80.0 70.0

\* X : parts per Million : 13C

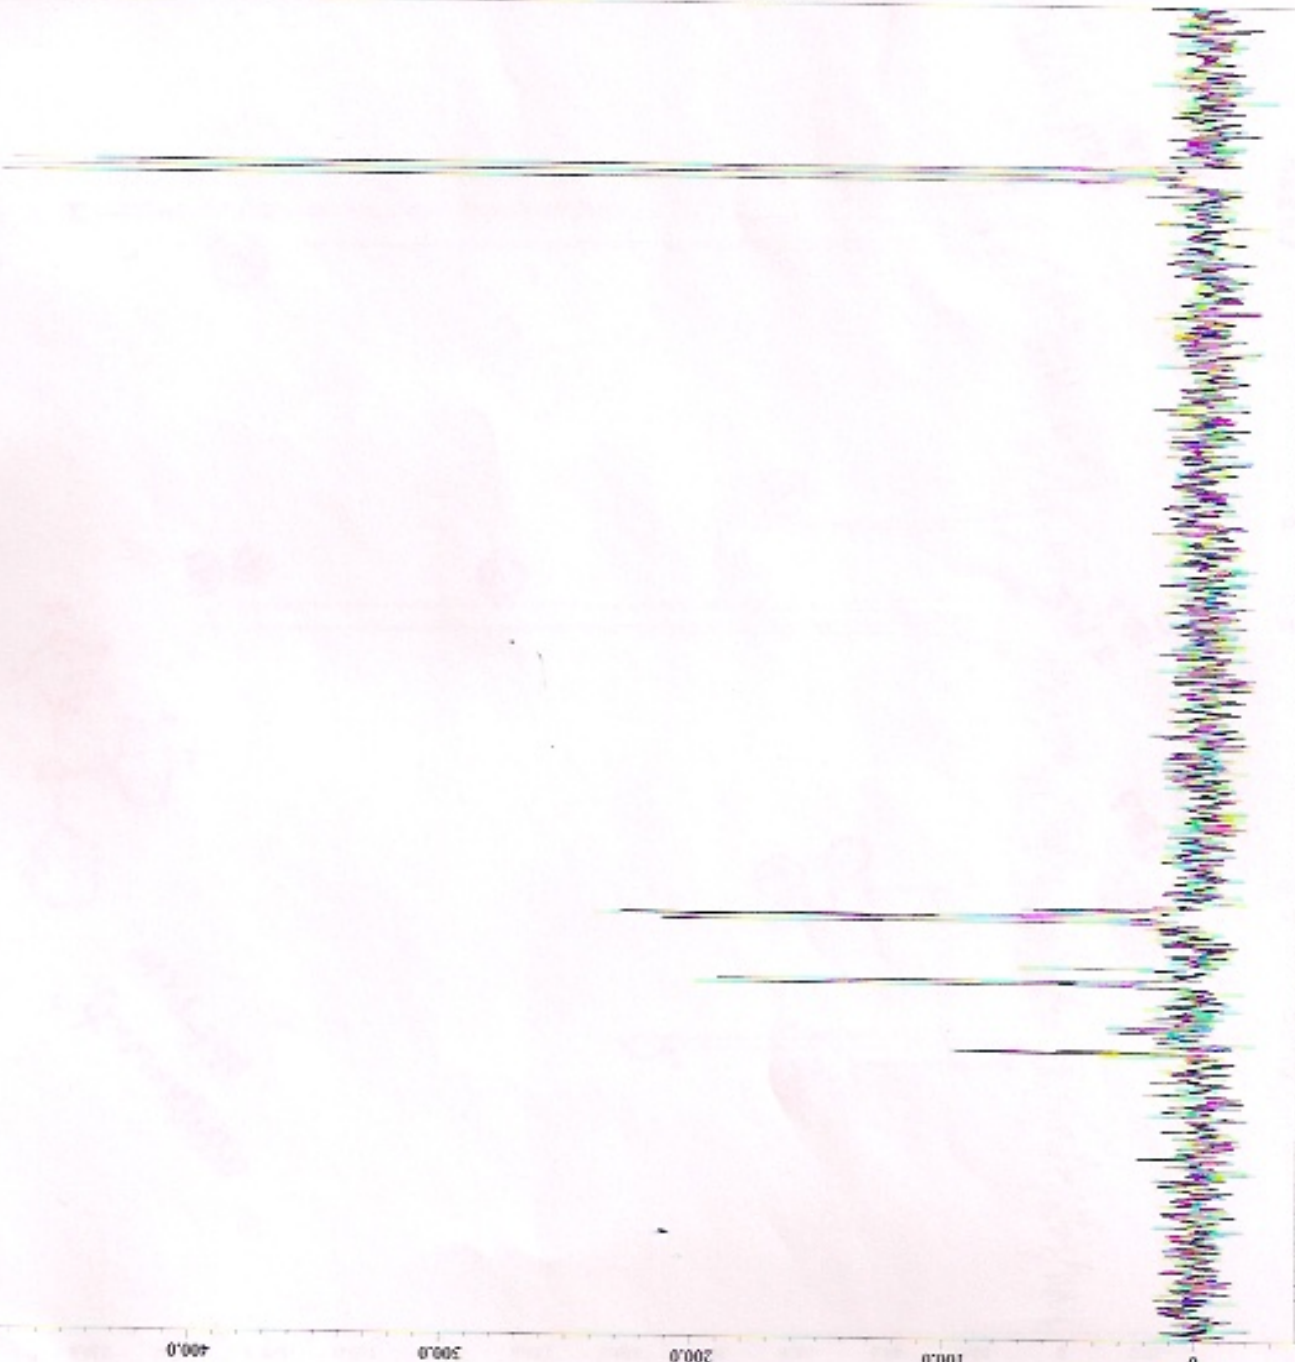

Yellowed oil/solid  
Test tube 4 - 7.  
Troy L.

$$\text{Ph}_2\text{P}-\text{C}_5\text{H}_4\text{S} \quad (\text{pure})$$

5th proton

3rd proton

File: psphorus

25th Annual Meeting of the American Society of Human Genetics

[illegible]

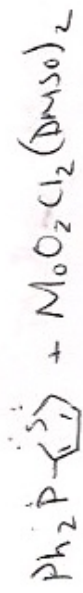

May June 2<sup>nd</sup>, 2016  
 Troy Luster  
 (purple crystals)

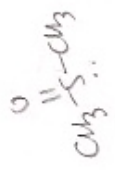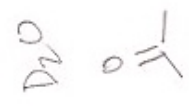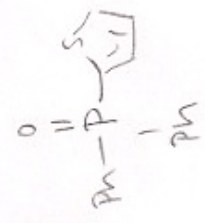

Std proton

File: Proton

Pulse Sequence: s2pul1

Solvent: cdcl3

Ambient temperature

Operator: chm241

INOVA-400 "woodward.gvsu.edu"

Relax. delay 1.000 sec

Pulse 45.0 degrees

Acq. time 2.049 sec

Width 6396.4 Hz

16 repetitions

OBSERVE H1, 399.7695340 MHz

DATA PROCESSING

Line broadening 0.2 Hz

FT size 65536

Total time 0 min, 55 sec

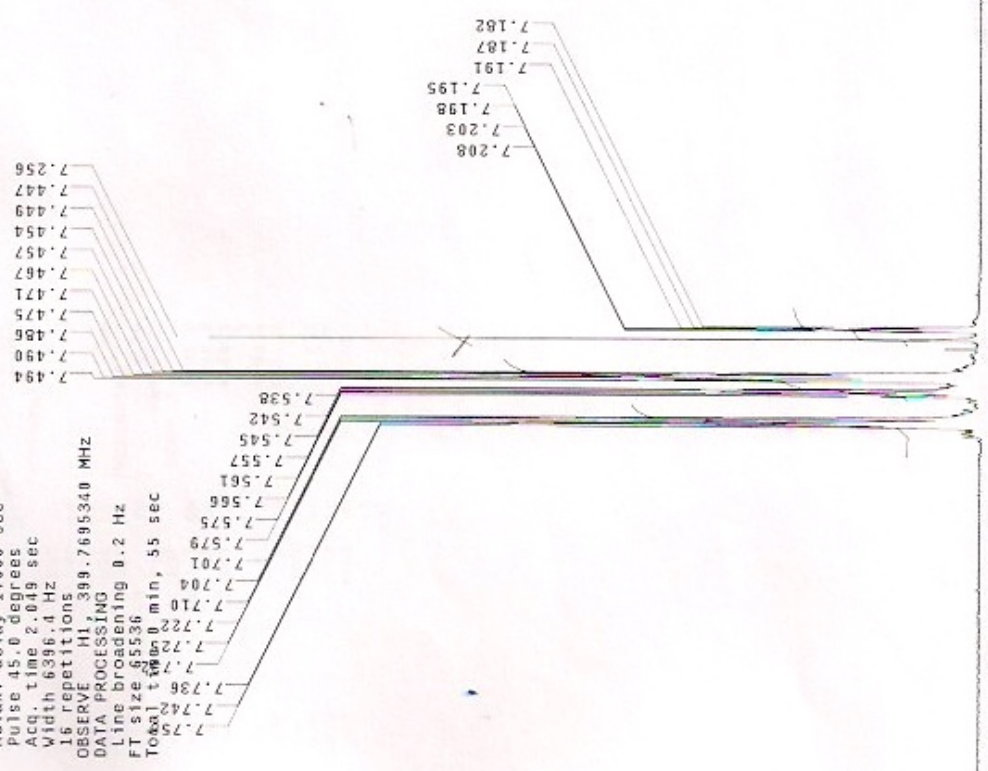

0 1 2 3 4 5 6 7 8 9 ppm

17.92

28.50 11.72 41.86

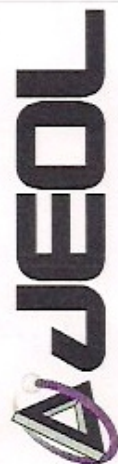

$\text{Ph}_2\text{P}(\text{C}_6\text{H}_5)_2 + \text{MoO}_3\text{Cl}_2$   
July 13, 2016  
Troy Lawster  
13C

Filename = TL (Ar)3P=O 13C CD  
Author = benderj\_lab  
Experiment = single\_pulse\_dec  
Sample\_id = S#545611  
Solvent = CHLOROFORM-D  
Creation\_time = 16-JUL-2000 06:48:19  
Revision\_time = 13-JUL-2016 15:22:18  
Current\_time = 13-JUL-2016 15:22:28  
Comment = Single Pulse with Bro  
Data\_format = 1D COMPLEX  
Dim\_size = 32768  
Dim\_title = 13C  
Dim\_units = [ppm]  
Dimensions = X  
Site = Eclipse+ 300  
Spectrometer = DELTA\_NMR  
Field\_strength = 7.0586013[T] (300)[MHz]  
X\_acq\_duration = 1.7334272[s]  
X\_domain = 13C  
X\_freq = 75.56823426[MHz]  
X\_offset = 100[ppm]  
X\_points = 32768  
X\_prescans = 4  
X\_resolution = 0.57689184[Hz]  
X\_sweep = 18.90359168[MHz]  
Irr\_domain = 1H  
Irr\_freq = 300.52965592[MHz]  
Irr\_offset = 5[ppm]  
Clipped = FALSE  
Mod\_return = 1  
Scans = 259  
Total\_scans = 259  
X\_90\_width = 10.86[us]  
X\_acq\_time = 1.7334272[s]  
X\_angle = 30[deg]  
X\_pulse = 3.62[us]  
Initial\_wait = 1[s]  
Phase\_preset = 3[us]  
Recvr\_gain = 30  
Relaxation\_delay = 1[s]  
Temp\_get = 23.2[dc]  
Unblank\_time = 2[us]

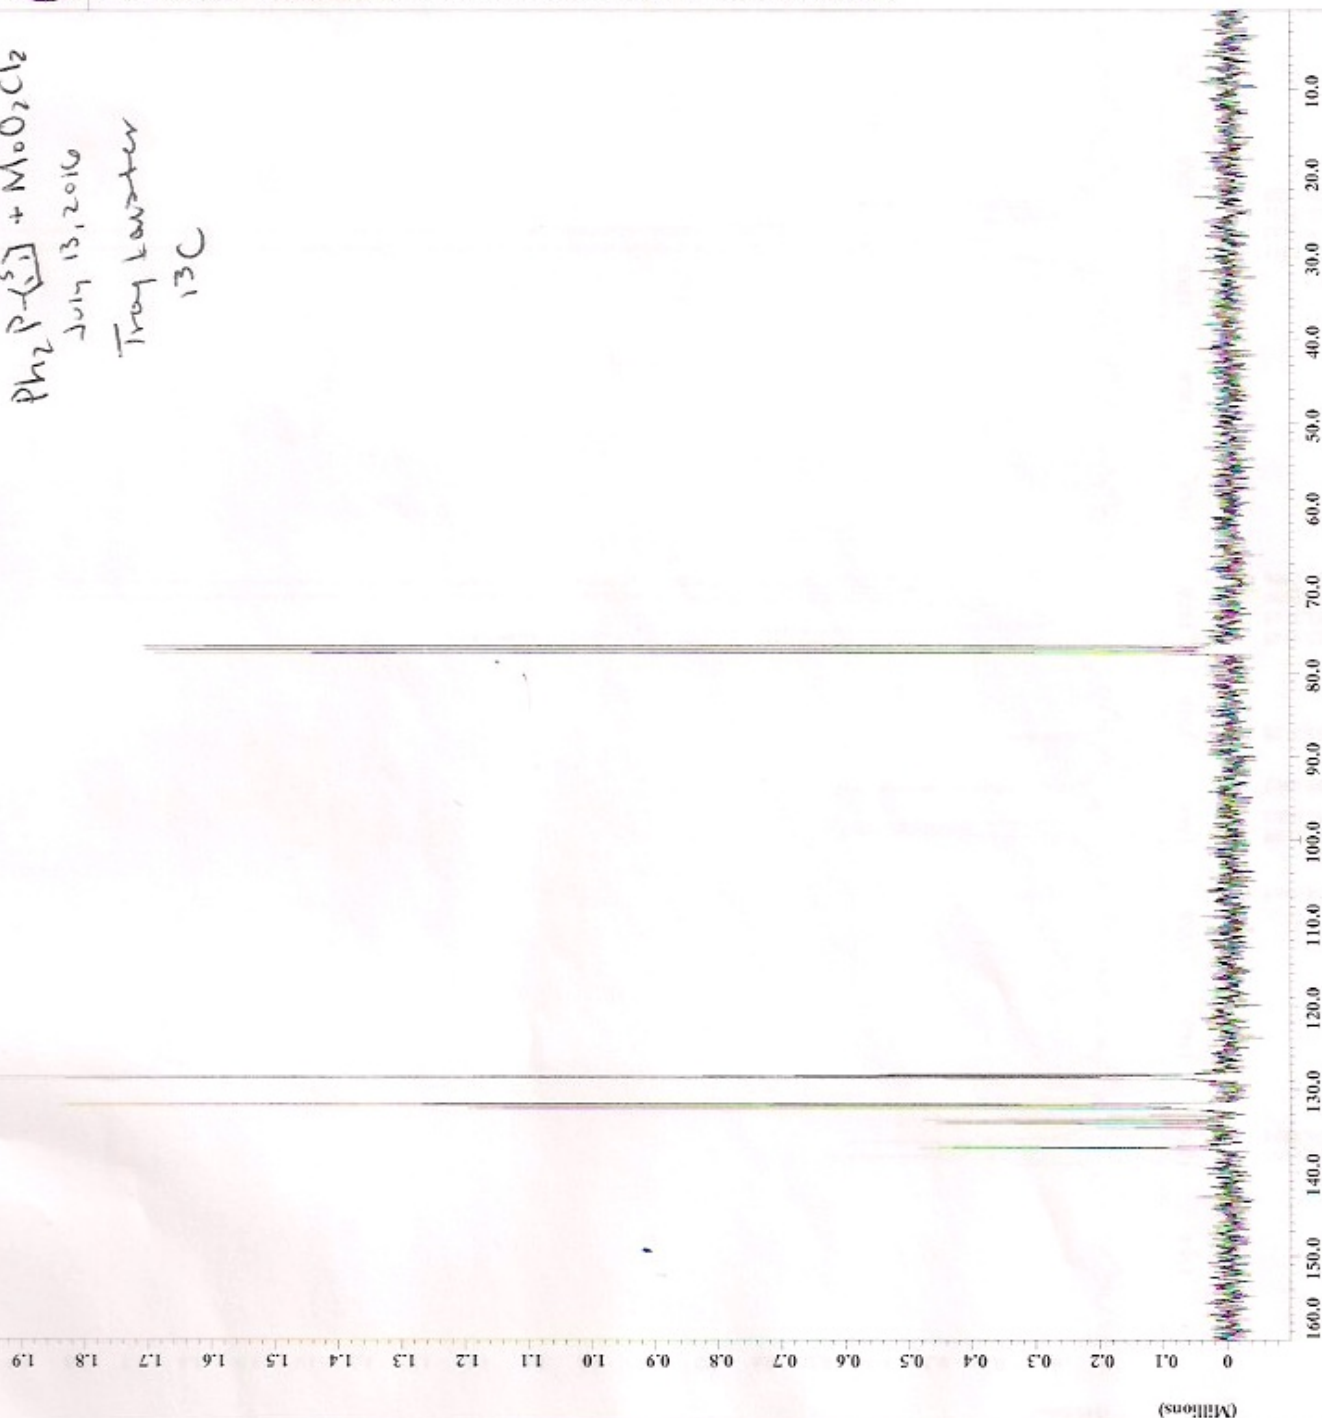

X : parts per Million : 13C

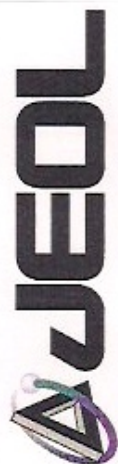

Filename = TL (Ar)3p=O 13C CD  
Author = benderj\_lab  
Experiment = single\_pulse\_dec  
Sample\_id = S#545611  
Solvent = CHLOROFORM-D  
Creation\_time = 16-JUL-2000 06:48:19  
Revision\_time = 13-JUL-2016 15:23:25  
Current\_time = 13-JUL-2016 15:23:31  
Comment = Single Pulse with Bro  
Data\_format = 1D COMPLEX  
Dim\_size = 32768  
Dim\_title = 13C  
Dim\_units = [ppm]  
Dimensions = X  
Site = Eclipse+ 300  
Spectrometer = DELTA\_NMR  
Field\_strength = 7.0585013[T] (300[MHz]  
X\_acq\_duration = 1.7334272[s]  
X\_domain = 13C  
X\_freq = 75.56823426[MHz]  
X\_offset = 100[ppm]  
X\_points = 32768  
X\_prescans = 4  
X\_resolution = 0.57689184[Hz]  
X\_sweep = 16.90359168[kHz]  
Irr\_domain = 1H  
Irr\_freq = 300.52965592[MHz]  
Irr\_offset = 5[ppm]  
Clipped = FALSE  
Mod\_return = 1  
Scans = 259  
Total\_scans = 259  
X\_90\_width = 10.86[us]  
X\_acq\_time = 1.7334272[s]  
X\_angle = 30[deg]  
X\_pulse = 3.02[us]  
Initial\_wait = 1[s]  
Phase\_preset = 3[us]  
Recvr\_gain = 30  
Relaxation\_delay = 1[s]  
Temp\_set = 23.2[deg]  
Unblank\_time = 2[us]

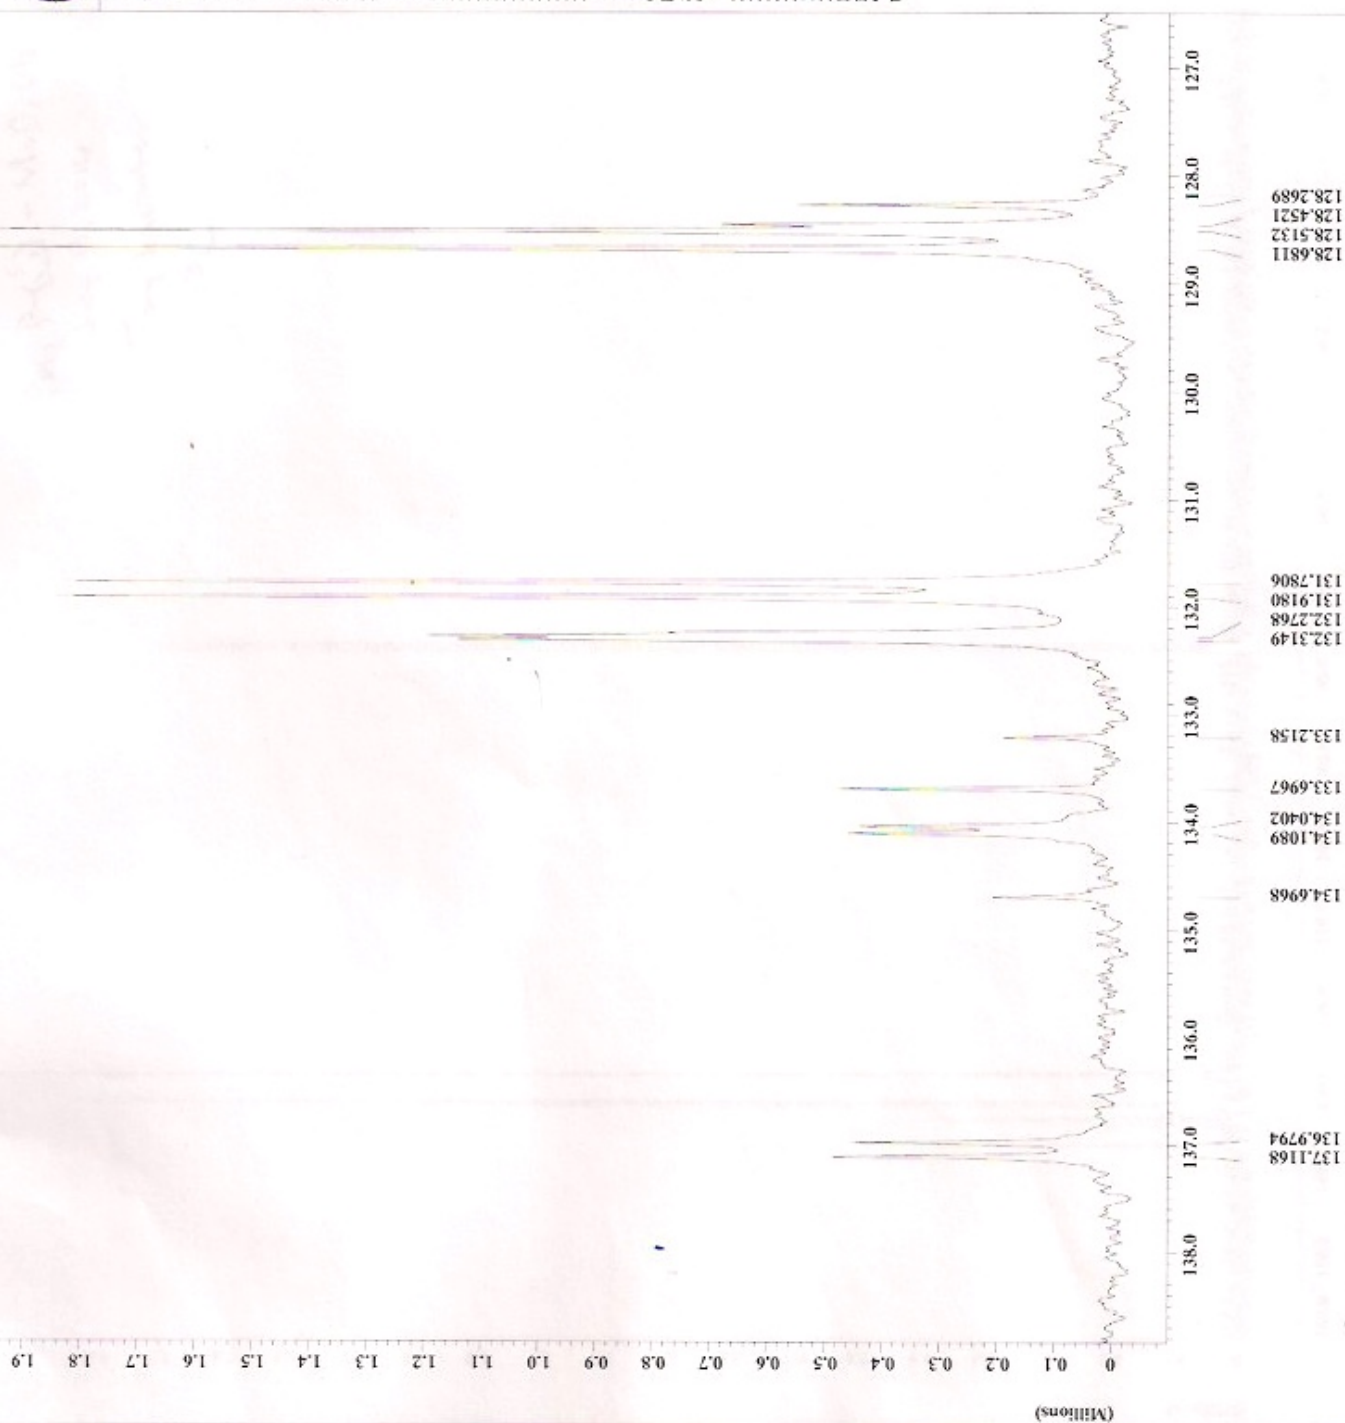

X : parts per Million : 13C

$\text{Ph}_2\text{P}(\text{tBu})_2 + \text{Na}_2\text{O}_2 \cdot 2\text{H}_2\text{O}$   
 June 2, 2016  
 Troy Luster  
 (Purple crystals)

Std proton

Std proton

File: Phosphorus

Phosphorus

| SAMPLE      |            | SPECIAL    |          |
|-------------|------------|------------|----------|
| date        | Jun 2 2016 | temp       | not used |
| solvent     | cdcl3      | gain       | 40       |
| file        | exp        | spin       | 20       |
| ACQUISITION | exp        | hst        | 0.008    |
| sw          | 21036.0    | pw         | 25.000   |
| at          | 1.600      | alpha      | 10.000   |
| np          | 67316      | il         | n        |
| fb          | 12000      | in         | n        |
| bs          | 64         | dp         | y        |
| dl          | 1.000      | hs         | ny       |
| nt          | 256        | PROCESSING |          |
| ct          | 256        | lb         | 1.00     |
| TRANSMITTER | p31        | fn         | not used |
| sfreq       | 161.835    | fn         | not used |
| tofr        | 5211.1     | sp         | 1592.6   |
| tpwr        | 12.500     | wp         | 8990.8   |
| pw          | 12.500     | rfl        | 4854.0   |
| DECOUPLER   | H1         | rfp        | -153.1   |
| dn          | 0          | lp         | -151.5   |
| dof         | yy         | plot       |          |
| da          | w          | wc         | 250      |
| daa         | 44         | sc         | 0        |
| dpwr        | 9200       | vs         | 21910    |
| daf         | th         | at         | 22       |
|             | cdc        | ph         |          |

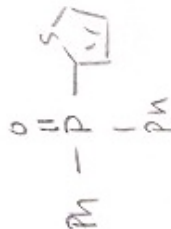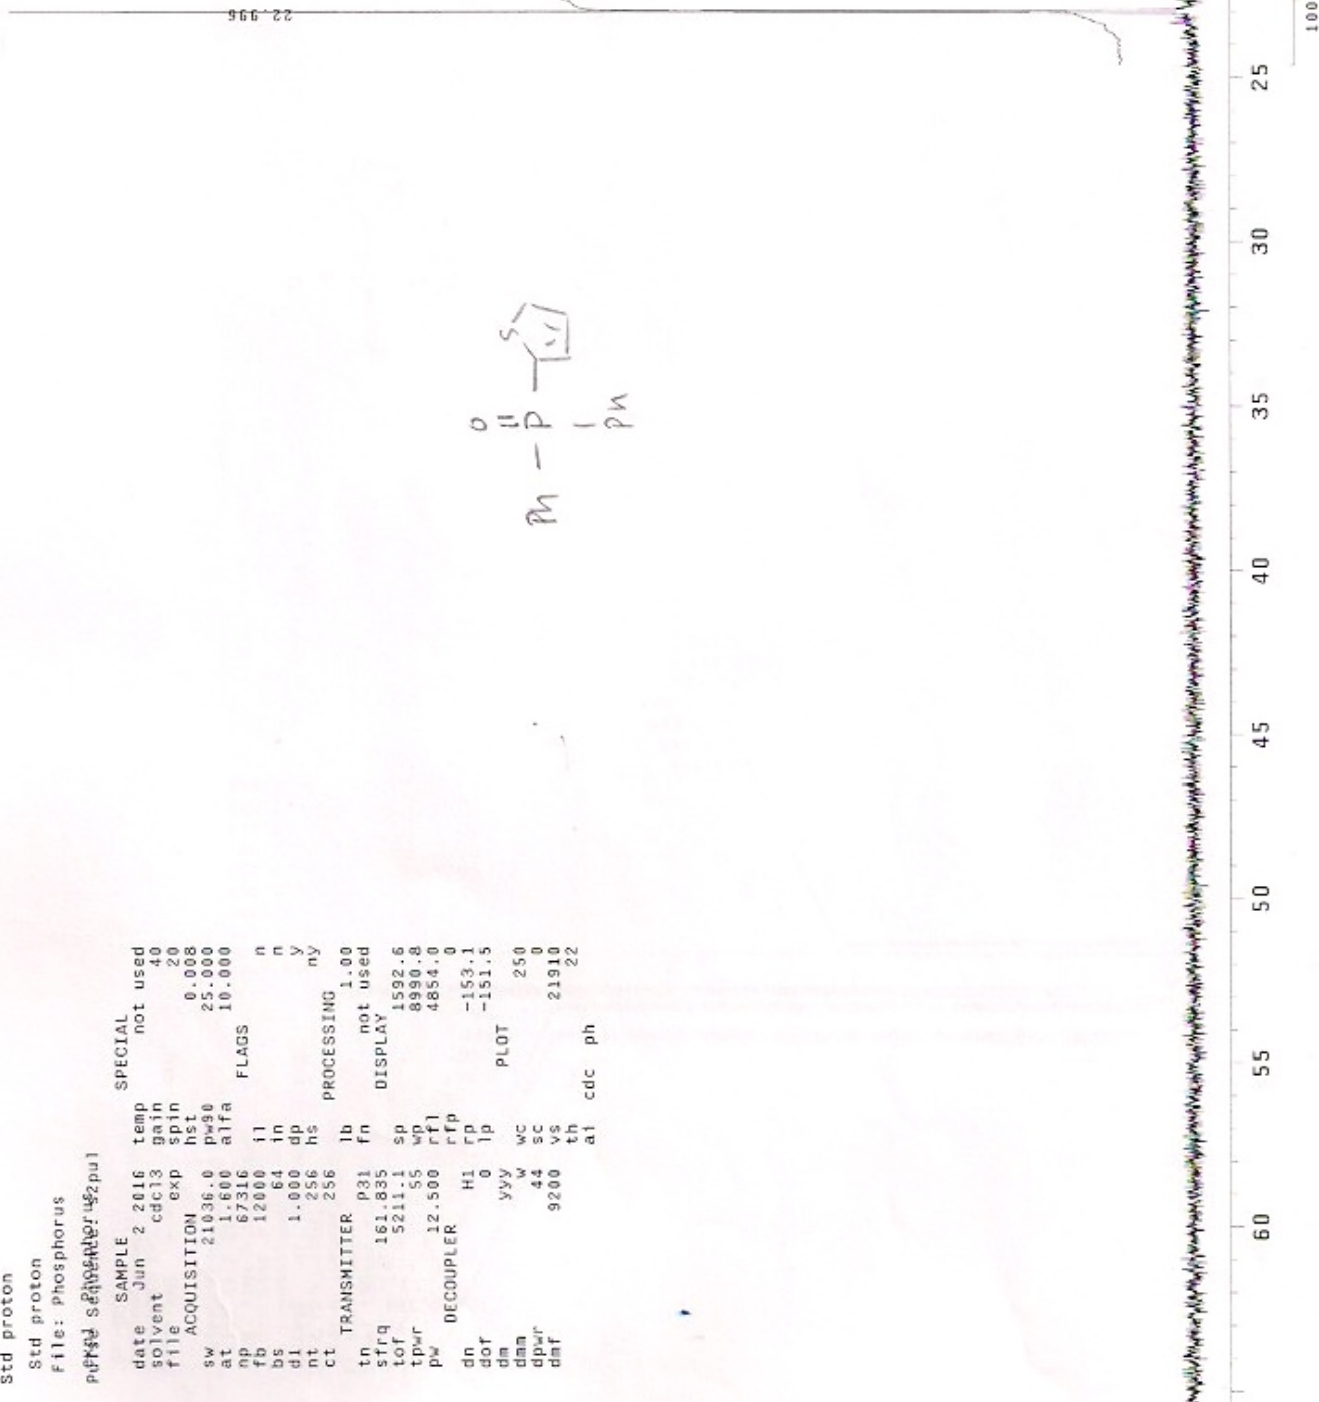

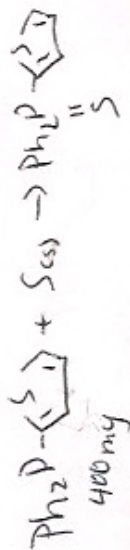

May 31, 2016

1H

Std proton

File: Proton

Pulse Sequence: s2pu1

Solvent: cdc13

Ambient temperature

Operator: chm241

INOVA-400 "woodward.gvsu.edu"

Relax. delay 1.000 sec

Pulse 45.0 degrees

Acq. time 2.030000

Width 6396.4 Hz

16 repetitions

OBSERVE H1 399.1695340 MHz

DATA PROCESSING

Line broadening 0.2 Hz

FT size 65536

Total time 0 min, 55 sec

7.252  
 7.254  
 7.422  
 7.425  
 7.428  
 7.431  
 7.434  
 7.438  
 7.447  
 7.451  
 7.454  
 7.463  
 7.470  
 7.472  
 7.494  
 7.498  
 7.500  
 7.501  
 7.503  
 7.506  
 7.510  
 7.517  
 7.522  
 7.528  
 7.531  
 7.535  
 7.537  
 7.540  
 7.712  
 7.715  
 7.722  
 7.725  
 7.728  
 7.731  
 7.734  
 7.737  
 7.740  
 7.743  
 7.746  
 7.749  
 7.752  
 7.755  
 7.758  
 7.761  
 7.764  
 7.767  
 7.770  
 7.773  
 7.776  
 7.779  
 7.782  
 7.785  
 7.788  
 7.791  
 7.794  
 7.797  
 7.800  
 7.803  
 7.806  
 7.809  
 7.812  
 7.815  
 7.818  
 7.821  
 7.824  
 7.827  
 7.830  
 7.833  
 7.836  
 7.839  
 7.842  
 7.845  
 7.848  
 7.851  
 7.854  
 7.857  
 7.860  
 7.863  
 7.866  
 7.869  
 7.872  
 7.875  
 7.878  
 7.881  
 7.884  
 7.887  
 7.890  
 7.893  
 7.896  
 7.899  
 7.902  
 7.905  
 7.908  
 7.911  
 7.914  
 7.917  
 7.920  
 7.923  
 7.926  
 7.929  
 7.932  
 7.935  
 7.938  
 7.941  
 7.944  
 7.947  
 7.950  
 7.953  
 7.956  
 7.959  
 7.962  
 7.965  
 7.968  
 7.971  
 7.974  
 7.977  
 7.980  
 7.983  
 7.986  
 7.989  
 7.992  
 7.995  
 7.998  
 8.001  
 8.004  
 8.007  
 8.010  
 8.013  
 8.016  
 8.019  
 8.022  
 8.025  
 8.028  
 8.031  
 8.034  
 8.037  
 8.040  
 8.043  
 8.046  
 8.049  
 8.052  
 8.055  
 8.058  
 8.061  
 8.064  
 8.067  
 8.070  
 8.073  
 8.076  
 8.079  
 8.082  
 8.085  
 8.088  
 8.091  
 8.094  
 8.097  
 8.100  
 8.103  
 8.106  
 8.109  
 8.112  
 8.115  
 8.118  
 8.121  
 8.124  
 8.127  
 8.130  
 8.133  
 8.136  
 8.139  
 8.142  
 8.145  
 8.148  
 8.151  
 8.154  
 8.157  
 8.160  
 8.163  
 8.166  
 8.169  
 8.172  
 8.175  
 8.178  
 8.181  
 8.184  
 8.187  
 8.190  
 8.193  
 8.196  
 8.199  
 8.202  
 8.205  
 8.208  
 8.211  
 8.214  
 8.217  
 8.220  
 8.223  
 8.226  
 8.229  
 8.232  
 8.235  
 8.238  
 8.241  
 8.244  
 8.247  
 8.250  
 8.253  
 8.256  
 8.259  
 8.262  
 8.265  
 8.268  
 8.271  
 8.274  
 8.277  
 8.280  
 8.283  
 8.286  
 8.289  
 8.292  
 8.295  
 8.298  
 8.301  
 8.304  
 8.307  
 8.310  
 8.313  
 8.316  
 8.319  
 8.322  
 8.325  
 8.328  
 8.331  
 8.334  
 8.337  
 8.340  
 8.343  
 8.346  
 8.349  
 8.352  
 8.355  
 8.358  
 8.361  
 8.364  
 8.367  
 8.370  
 8.373  
 8.376  
 8.379  
 8.382  
 8.385  
 8.388  
 8.391  
 8.394  
 8.397  
 8.400  
 8.403  
 8.406  
 8.409  
 8.412  
 8.415  
 8.418  
 8.421  
 8.424  
 8.427  
 8.430  
 8.433  
 8.436  
 8.439  
 8.442  
 8.445  
 8.448  
 8.451  
 8.454  
 8.457  
 8.460  
 8.463  
 8.466  
 8.469  
 8.472  
 8.475  
 8.478  
 8.481  
 8.484  
 8.487  
 8.490  
 8.493  
 8.496  
 8.499  
 8.502  
 8.505  
 8.508  
 8.511  
 8.514  
 8.517  
 8.520  
 8.523  
 8.526  
 8.529  
 8.532  
 8.535  
 8.538  
 8.541  
 8.544  
 8.547  
 8.550  
 8.553  
 8.556  
 8.559  
 8.562  
 8.565  
 8.568  
 8.571  
 8.574  
 8.577  
 8.580  
 8.583  
 8.586  
 8.589  
 8.592  
 8.595  
 8.598  
 8.601  
 8.604  
 8.607  
 8.610  
 8.613  
 8.616  
 8.619  
 8.622  
 8.625  
 8.628  
 8.631  
 8.634  
 8.637  
 8.640  
 8.643  
 8.646  
 8.649  
 8.652  
 8.655  
 8.658  
 8.661  
 8.664  
 8.667  
 8.670  
 8.673  
 8.676  
 8.679  
 8.682  
 8.685  
 8.688  
 8.691  
 8.694  
 8.697  
 8.700  
 8.703  
 8.706  
 8.709  
 8.712  
 8.715  
 8.718  
 8.721  
 8.724  
 8.727  
 8.730  
 8.733  
 8.736  
 8.739  
 8.742  
 8.745  
 8.748  
 8.751  
 8.754  
 8.757  
 8.760  
 8.763  
 8.766  
 8.769  
 8.772  
 8.775  
 8.778  
 8.781  
 8.784  
 8.787  
 8.790  
 8.793  
 8.796  
 8.799  
 8.802  
 8.805  
 8.808  
 8.811  
 8.814  
 8.817  
 8.820  
 8.823  
 8.826  
 8.829  
 8.832  
 8.835  
 8.838  
 8.841  
 8.844  
 8.847  
 8.850  
 8.853  
 8.856  
 8.859  
 8.862  
 8.865  
 8.868  
 8.871  
 8.874  
 8.877  
 8.880  
 8.883  
 8.886  
 8.889  
 8.892  
 8.895  
 8.898  
 8.901  
 8.904  
 8.907  
 8.910  
 8.913  
 8.916  
 8.919  
 8.922  
 8.925  
 8.928  
 8.931  
 8.934  
 8.937  
 8.940  
 8.943  
 8.946  
 8.949  
 8.952  
 8.955  
 8.958  
 8.961  
 8.964  
 8.967  
 8.970  
 8.973  
 8.976  
 8.979  
 8.982  
 8.985  
 8.988  
 8.991  
 8.994  
 8.997  
 9.000  
 9.003  
 9.006  
 9.009  
 9.012  
 9.015  
 9.018  
 9.021  
 9.024  
 9.027  
 9.030  
 9.033  
 9.036  
 9.039  
 9.042  
 9.045  
 9.048  
 9.051  
 9.054  
 9.057  
 9.060  
 9.063  
 9.066  
 9.069  
 9.072  
 9.075  
 9.078  
 9.081  
 9.084  
 9.087  
 9.090  
 9.093  
 9.096  
 9.099  
 9.102  
 9.105  
 9.108  
 9.111  
 9.114  
 9.117  
 9.120  
 9.123  
 9.126  
 9.129  
 9.132  
 9.135  
 9.138  
 9.141  
 9.144  
 9.147  
 9.150  
 9.153  
 9.156  
 9.159  
 9.162  
 9.165  
 9.168  
 9.171  
 9.174  
 9.177  
 9.180  
 9.183  
 9.186  
 9.189  
 9.192  
 9.195  
 9.198  
 9.201  
 9.204  
 9.207  
 9.210  
 9.213  
 9.216  
 9.219  
 9.222  
 9.225  
 9.228  
 9.231  
 9.234  
 9.237  
 9.240  
 9.243  
 9.246  
 9.249  
 9.252  
 9.255  
 9.258  
 9.261  
 9.264  
 9.267  
 9.270  
 9.273  
 9.276  
 9.279  
 9.282  
 9.285  
 9.288  
 9.291  
 9.294  
 9.297  
 9.300  
 9.303  
 9.306  
 9.309  
 9.312  
 9.315  
 9.318  
 9.321  
 9.324  
 9.327  
 9.330  
 9.333  
 9.336  
 9.339  
 9.342  
 9.345  
 9.348  
 9.351  
 9.354  
 9.357  
 9.360  
 9.363  
 9.366  
 9.369  
 9.372  
 9.375  
 9.378  
 9.381  
 9.384  
 9.387  
 9.390  
 9.393  
 9.396  
 9.399  
 9.402  
 9.405  
 9.408  
 9.411  
 9.414  
 9.417  
 9.420  
 9.423  
 9.426  
 9.429  
 9.432  
 9.435  
 9.438  
 9.441  
 9.444  
 9.447  
 9.450  
 9.453  
 9.456  
 9.459  
 9.462  
 9.465  
 9.468  
 9.471  
 9.474  
 9.477  
 9.480  
 9.483  
 9.486  
 9.489  
 9.492  
 9.495  
 9.498  
 9.501  
 9.504  
 9.507  
 9.510  
 9.513  
 9.516  
 9.519  
 9.522  
 9.525  
 9.528  
 9.531  
 9.534  
 9.537  
 9.540  
 9.543  
 9.546  
 9.549  
 9.552  
 9.555  
 9.558  
 9.561  
 9.564  
 9.567  
 9.570  
 9.573  
 9.576  
 9.579  
 9.582  
 9.585  
 9.588  
 9.591  
 9.594  
 9.597  
 9.600  
 9.603  
 9.606  
 9.609  
 9.612  
 9.615  
 9.618  
 9.621  
 9.624  
 9.627  
 9.630  
 9.633  
 9.636  
 9.639  
 9.642  
 9.645  
 9.648  
 9.651  
 9.654  
 9.657  
 9.660  
 9.663  
 9.666  
 9.669  
 9.672  
 9.675  
 9.678  
 9.681  
 9.684  
 9.687  
 9.690  
 9.693  
 9.696  
 9.699  
 9.702  
 9.705  
 9.708  
 9.711  
 9.714  
 9.717  
 9.720  
 9.723  
 9.726  
 9.729  
 9.732  
 9.735  
 9.738  
 9.741  
 9.744  
 9.747  
 9.750  
 9.753  
 9.756  
 9.759  
 9.762  
 9.765  
 9.768  
 9.771  
 9.774  
 9.777  
 9.780  
 9.783  
 9.786  
 9.789  
 9.792  
 9.795  
 9.798  
 9.801  
 9.804  
 9.807  
 9.810  
 9.813  
 9.816  
 9.819  
 9.822  
 9.825  
 9.828  
 9.831  
 9.834  
 9.837  
 9.840  
 9.843  
 9.846  
 9.849  
 9.852  
 9.855  
 9.858  
 9.861  
 9.864  
 9.867  
 9.870  
 9.873  
 9.876  
 9.879  
 9.882  
 9.885  
 9.888  
 9.891  
 9.894  
 9.897  
 9.900  
 9.903  
 9.906  
 9.909  
 9.912  
 9.915  
 9.918  
 9.921  
 9.924  
 9.927  
 9.930  
 9.933  
 9.936  
 9.939  
 9.942  
 9.945  
 9.948  
 9.951  
 9.954  
 9.957  
 9.960  
 9.963  
 9.966  
 9.969  
 9.972  
 9.975  
 9.978  
 9.981  
 9.984  
 9.987  
 9.990  
 9.993  
 9.996  
 9.999  
 10.002  
 10.005  
 10.008  
 10.011  
 10.014  
 10.017  
 10.020  
 10.023  
 10.026  
 10.029  
 10.032  
 10.035  
 10.038  
 10.041  
 10.044  
 10.047  
 10.050  
 10.053  
 10.056  
 10.059  
 10.062  
 10.065  
 10.068  
 10.071  
 10.074  
 10.077  
 10.080  
 10.083  
 10.086  
 10.089  
 10.092  
 10.095  
 10.098  
 10.101  
 10.104  
 10.107  
 10.110  
 10.113  
 10.116  
 10.119  
 10.122  
 10.125  
 10.128  
 10.131  
 10.134  
 10.137  
 10.140  
 10.143  
 10.146  
 10.149  
 10.152  
 10.155  
 10.158  
 10.161  
 10.164  
 10.167  
 10.170  
 10.173  
 10.176  
 10.179  
 10.182  
 10.185  
 10.188  
 10.191  
 10.194  
 10.197  
 10.200  
 10.203  
 10.206  
 10.209  
 10.212  
 10.215  
 10.218  
 10.221  
 10.224  
 10.227  
 10.230  
 10.233  
 10.236  
 10.239  
 10.242  
 10.245  
 10.248  
 10.251  
 10.254  
 10.257  
 10.260  
 10.263  
 10.266  
 10.269  
 10.272  
 10.275  
 10.278  
 10.281  
 10.284  
 10.287  
 10.290  
 10.293  
 10.296  
 10.299  
 10.302  
 10.305  
 10.308  
 10.311  
 10.314  
 10.317  
 10.320  
 10.323  
 10.326  
 10.329  
 10.332  
 10.335  
 10.338  
 10.341  
 10.344  
 10.347  
 10.350  
 10.353  
 10.356  
 10.359  
 10.362  
 10.365  
 10.368  
 10.371  
 10.374  
 10.377  
 10.380  
 10.383  
 10.386  
 10.389  
 10.392  
 10.395  
 10.398  
 10.401  
 10.404  
 10.407  
 10.410  
 10.413  
 10.416  
 10.419  
 10.422  
 10.425  
 10.428  
 10.431  
 10.434  
 10.437  
 10.440  
 10.443  
 10.446  
 10.449  
 10.452  
 10.455  
 10.458  
 10.461  
 10.464  
 10.467  
 10.470  
 10.473  
 10.476  
 10.479  
 10.482  
 10.485  
 10.488  
 10.491  
 10.494  
 10.497  
 10.500  
 10.503  
 10.506  
 10.509  
 10.512  
 10.515  
 10.518  
 10.521  
 10.524  
 10.527  
 10.530  
 10.533  
 10.536  
 10.539  
 10.542  
 10.545  
 10.548  
 10.551  
 10.554  
 10.557  
 10.560  
 10.563  
 10.566  
 10.569  
 10.572  
 10.575  
 10.578  
 10.581  
 10.584  
 10.587  
 10.590  
 10.593  
 10.596  
 10.599  
 10.602  
 10.605  
 10.608  
 10.611  
 10.614  
 10.617  
 10.620  
 10.623  
 10.626  
 10.629  
 10.632  
 10.635  
 10.638  
 10.641  
 10.644  
 10.647  
 10.650  
 10.653  
 10.656  
 10.659  
 10.662  
 10.665  
 10.668  
 10.671  
 10.674  
 10.677  
 10.680  
 10.683  
 10.686  
 10.689  
 10.692  
 10.695  
 10.698  
 10.701  
 10.704  
 10.707  
 10.710  
 10.713  
 10.716  
 10.719  
 10.722  
 10.725  
 10.728  
 10.731  
 10.734  
 10.737  
 10.740  
 10.743  
 10.746  
 10.749  
 10.752  
 10.755  
 10.758  
 10.761  
 10.764  
 10.767  
 10.770  
 10.773  
 10.776  
 10.779  
 10.782  
 10.785  
 10.788  
 10.791  
 10.794  
 10.797  
 10.800  
 10.803  
 10.806  
 10.809  
 10.812  
 10.815  
 10.818  
 10.821  
 10.824  
 10.827  
 10.830  
 10.833  
 10.836  
 10.839  
 10.842  
 10.845  
 10.848  
 10.851  
 10.854  
 10.857  
 10.860  
 10.863  
 10.866  
 10.869  
 10.872  
 10.875  
 10.878  
 10.881  
 10.884  
 10.887  
 10.890  
 10.893  
 10.896  
 10.899  
 10.902  
 10.905  
 10.908  
 10.911  
 10.914  
 10.917  
 10.920  
 10.923  
 10.926  
 10.929  
 10.932  
 10.935  
 10.938  
 10.941  
 10.944  
 10.947  
 10.950

6-13-16  
Ph<sub>2</sub>P<O>  
CDCl<sub>3</sub>

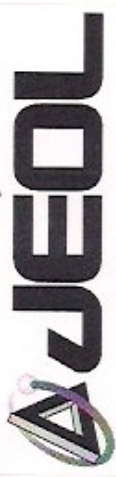

Filename = TL 13C Ar3P=S CDCl  
Author = benderj\_lab  
Experiment = single\_pulse\_dec  
Sample\_id = S#370134  
Solvent = CHLOROFORM-D  
Creation\_time = 16-JUN-2000 02:20:51  
Revision\_time = 13-JUN-2016 10:51:10  
Current\_time = 13-JUN-2016 10:51:22  
Comment = Single Pulse with Bro  
Data\_format = 1D COMPLEX  
Dim\_size = 32768  
Dim\_title = 13C  
Dim\_units = (ppm)  
Dimensions = X  
Site = Eclipse+ 300  
Spectrometer = DELTA\_NMR  
Field\_strength = 7.0586013[T] (300[MHz])  
X\_acq\_duration = 1.7334272[s]  
X\_domain = 13C  
X\_freq = 75.56823426[MHz]  
X\_offset = 100[ppm]  
X\_points = 32768  
X\_prescans = 4  
X\_resolution = 0.57689184[Hz]  
X\_sweep = 18.90359168[kHz]  
Irr\_domain = 1H  
Irr\_freq = 300.52965592[MHz]  
Irr\_offset = 5[ppm]  
Clipped = FALSE  
Mod\_return = 1  
Scans = 727  
Total\_scans = 727  
X\_90\_width = 10.86[us]  
X\_acq\_time = 1.7334272[s]  
X\_angle = 30[deg]  
X\_pulse = 3.62[us]  
Initial\_wait = 1[s]  
Phase\_preset = 3[us]  
Recvr\_gain = 30  
Relaxation\_delay = 1[s]  
Temp\_get = 22.8[dC]  
Unblank\_time = 2[us]

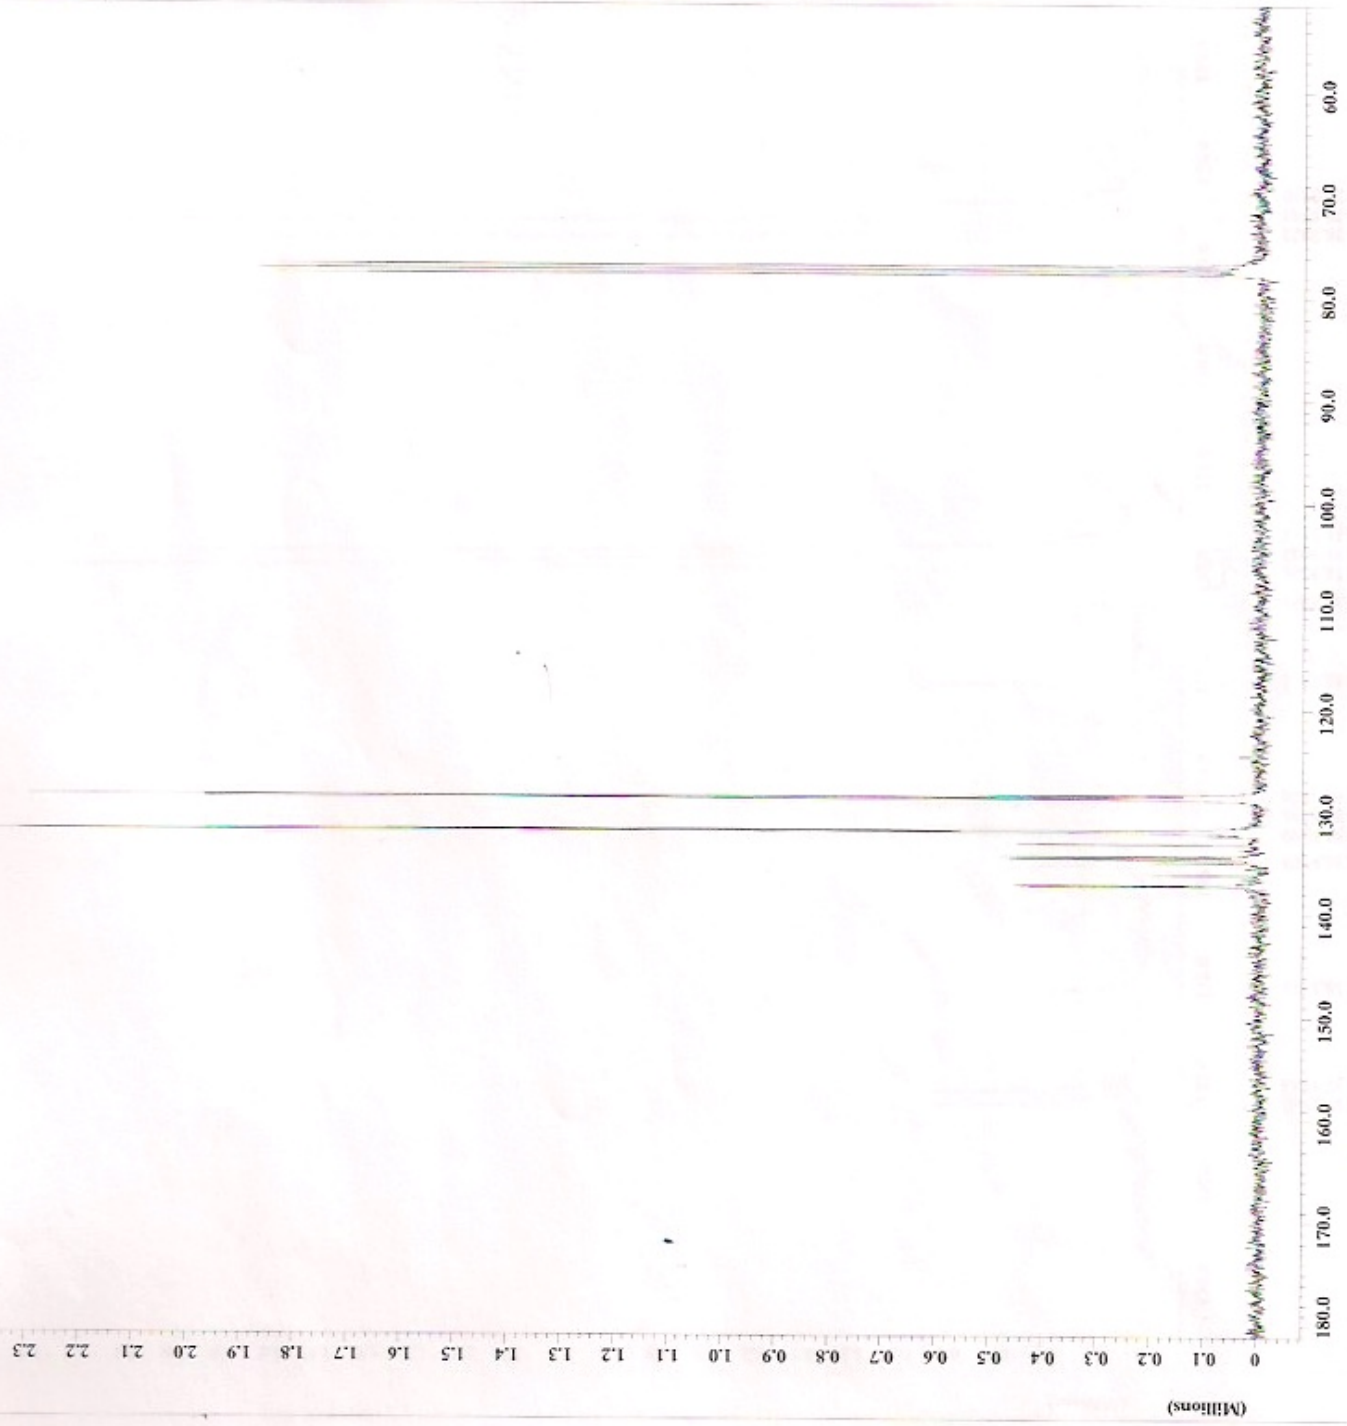

X : parts per Million : 13C

S<sub>11</sub>  
Ph<sub>2</sub>P-C<sub>5</sub>

6-17-16

ADJ

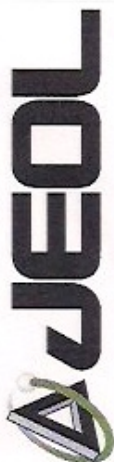

(Millions)

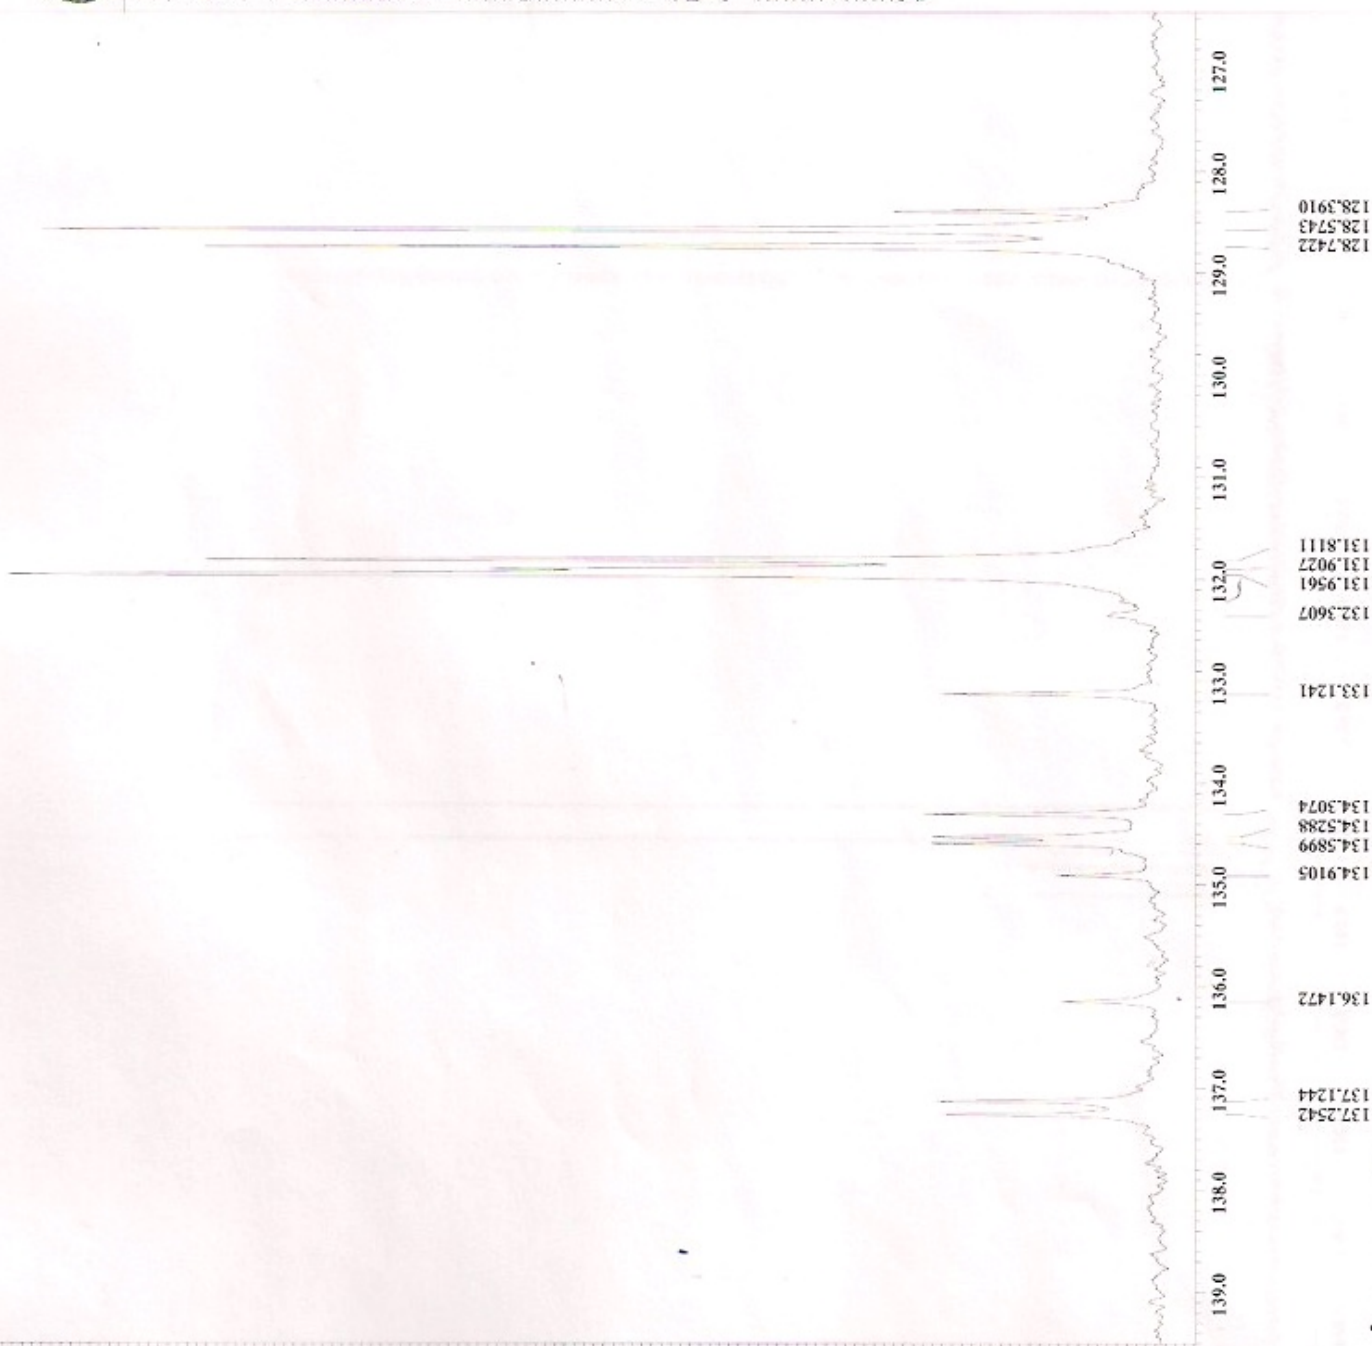

X : parts per Million : 13C

```

Filename      = TL 13C Ar3P=S CDC1
Author        = benderj_lab
Experiment    = single_pulse_dec
Sample_id     = S#370134
Solvent       = CHLOROFORM-D
Creation_time = 16-JUN-2000 02:20:51
Revision_time = 13-JUN-2016 10:52:00
Current_time  = 13-JUN-2016 10:52:16

Comment       = Single Pulse with Bro
Data_format   = 1D COMPLEX
Dim_size      = 32768
Dim_title     = 13C
Dim_units     = [ppm]
Dimensions    = X
Site          = Eclipse+ 300
Spectrometer  = DELTA_NMR

Field_strength = 7.0586013(T) (300[MHz]
X_acq_duration = 1.7334272[s]
X_domain       = 13C
X_freq         = 75.56823426[MHz]
X_offset       = 100[ppm]
X_points       = 32768
X_prescans     = 4
X_resolution   = 0.57689184[Hz]
X_sweep        = 18.90359168[KHz]
Irr_domain     = 1H
Irr_freq       = 300.52965592[MHz]
Irr_offset     = 5[ppm]
Clipped        = FALSE
Mod_return     = 1
Scans          = 727
Total_scans    = 727

X_90_width     = 10.86[us]
X_acq_time     = 1.7334272[s]
X_angle        = 30[deg]
X_pulse        = 3.62[us]
Initial_wait   = 1[s]
Phase_preset   = 3[us]
Recvr_gain     = 30
Relaxation_delay = 1[s]
Temp_get       = 22.8[dc]
Unblank_time   = 2[us]
  
```

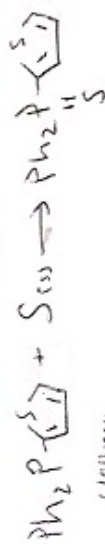

400mg

May 31, 2016

31P (reference)

Std proton

File: Phosphorus

Pulse Sequence: zgpg30

Solvent: cdcl3

Ambient Temperature

Operator: chm241

INOVA-400 "woodward.qvsu.edu"

Relax. delay 1.000 sec

Pulse 45.0 degrees

Acq. time 1.600 sec

Width 21036.0 Hz

256 repetitions

OBSERVE F31, 161.8294930 MHz

DECOUPLE H1, 399.7715331 MHz

Power 44 dB

continuously on

WALTZ-16 modulated

DATA PROCESSING

Line broadening 1.0 Hz

FT size 131072

Total time 11 min, 7 sec

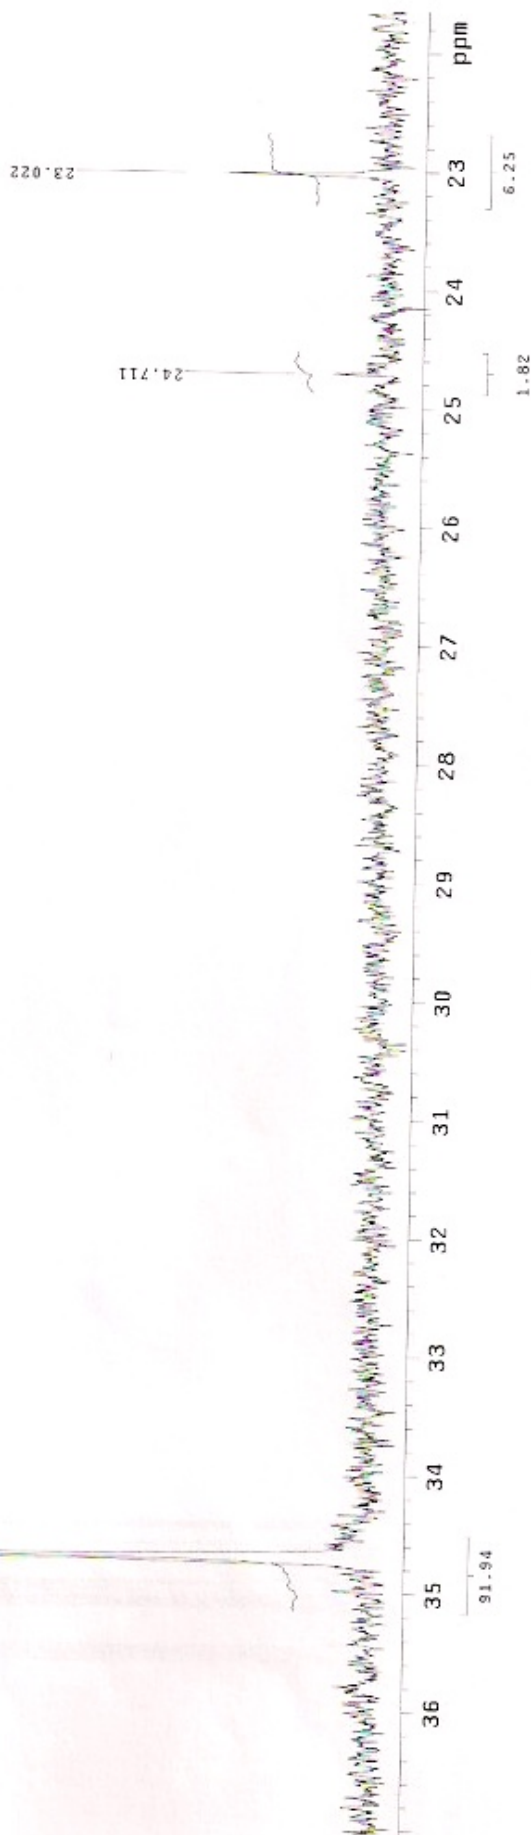



Spec. 1

Two L-  
Se + Product

**Ph2(thienyl)PSe  
31P NMR in CDCl3, 161 MHz**

Std proton  
File: Phosphorus  
Pulse Sequence: s2pu1  
Solvent: cdcl3  
Ambient temperature  
Operator: chm241  
INOVA-400 "woodward.gvsu.edu"  
Relax. delay 1.000 sec  
Pulse 45.0 degrees  
Acq. time 1.600 sec  
Width 21036.0 Hz  
64 repetitions  
OBSERVE P31, 161.8294930 MHz  
DECOUPLE H1, 399.7715331 MHz  
Power 44 dB  
continuously on  
VAT2-16 modulated  
DATA PROCESSING  
line broadening 1.0 Hz  
FT size 131072  
Total time 2 min, 46 sec

B

23.287

A

25.562

23.025

C  
010-78

29 28 27 26 25 24 23 22 21 20 ppm

Thienyl-P=Se 77Se  
single\_pulse

Ph2(thienyl)PSe in CDCl3  
77Se NMR, 76 MHz

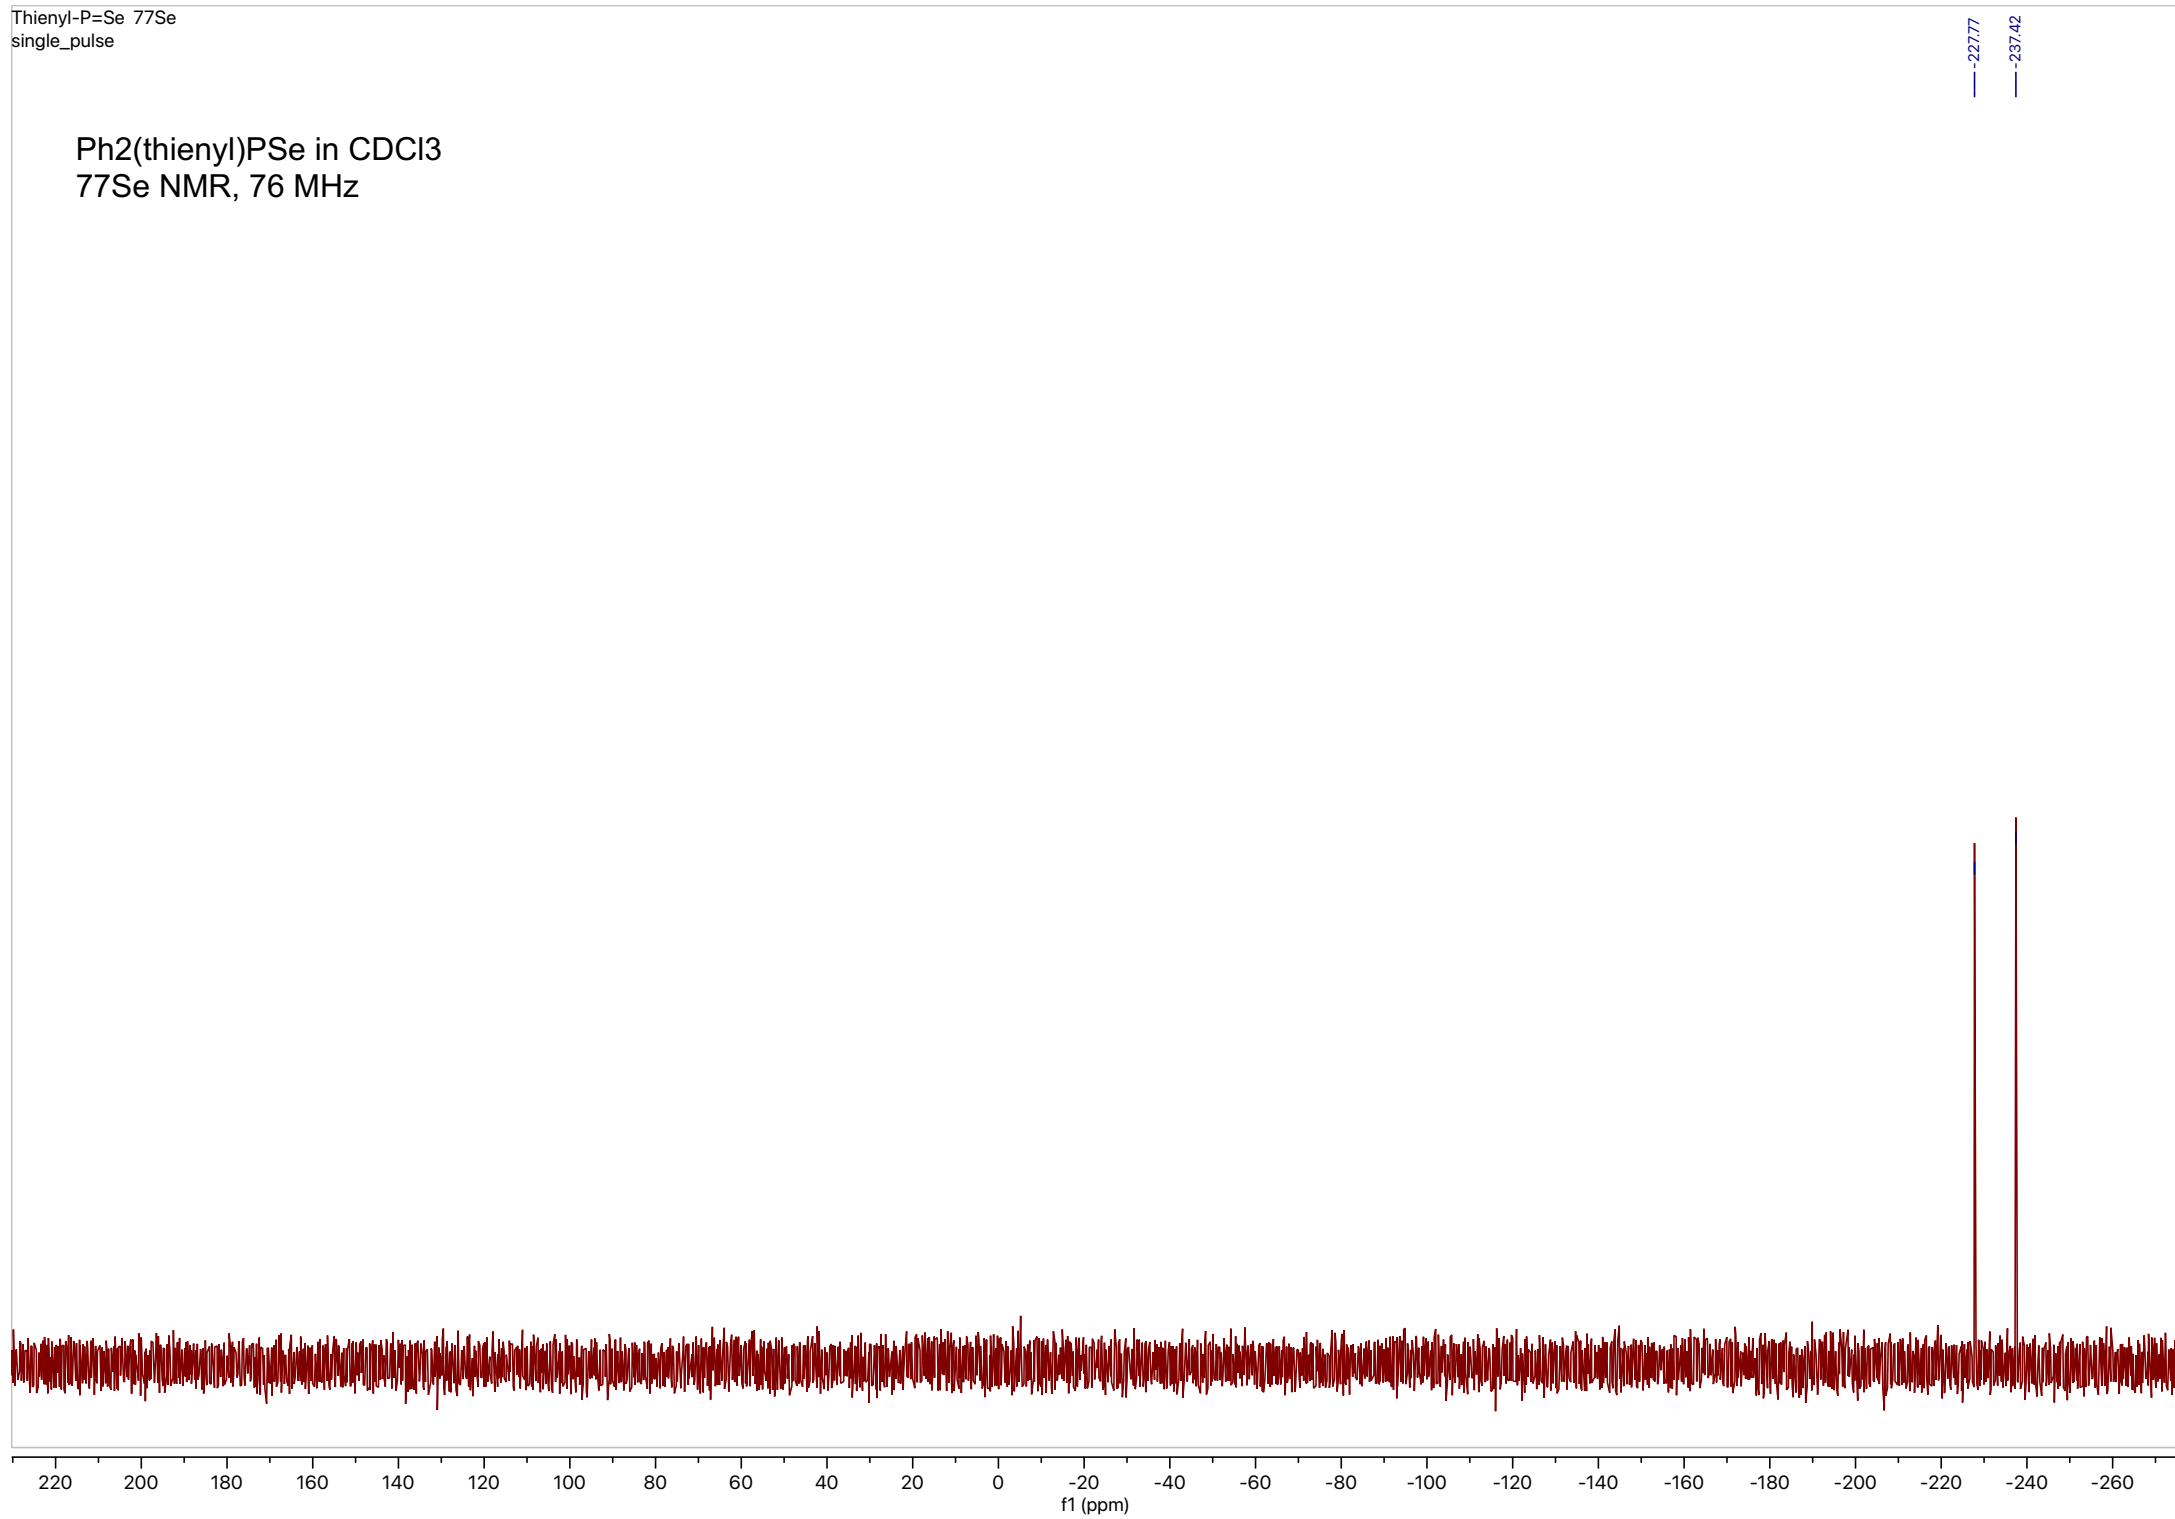

phosphine oxide + La(NO<sub>3</sub>)<sub>3</sub> in CD<sub>3</sub>CN  
1H NMR, 300 MHz

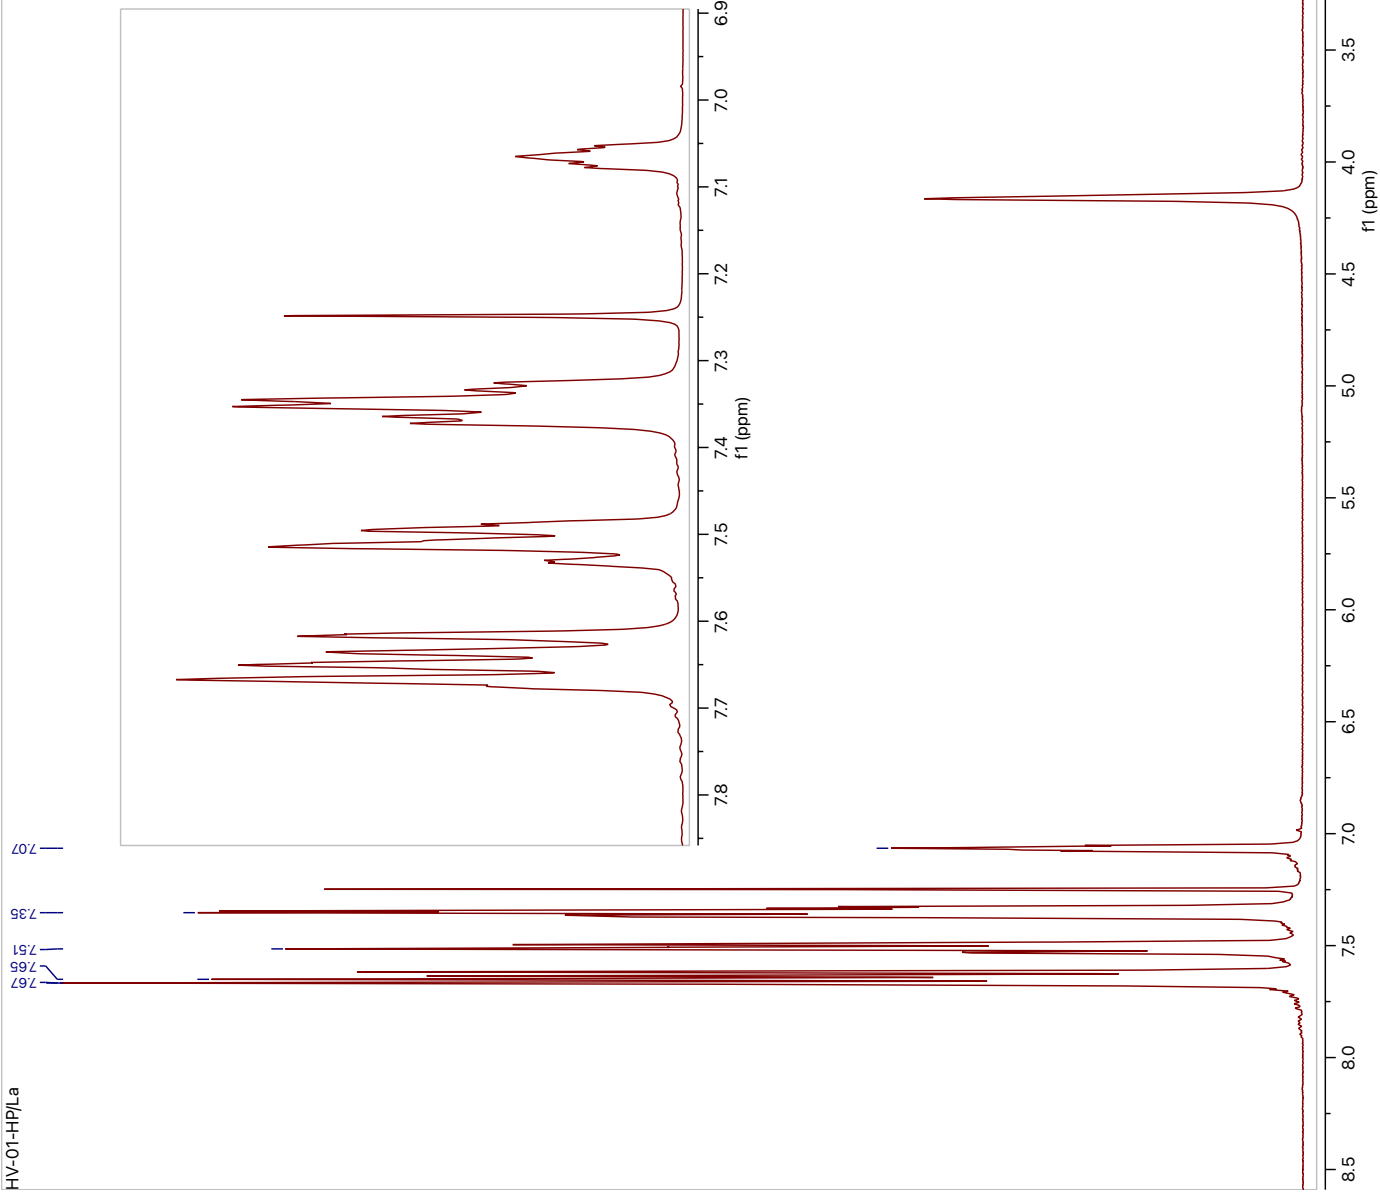

phosphine oxide + La(NO<sub>3</sub>)<sub>3</sub> in CD<sub>3</sub>CN  
31P NMR, 121 MHz

26.96

f1 (ppm)

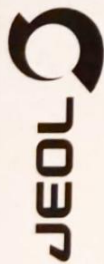

Filename = GS (OTF) 3La (O=PAR3) 3  
Author = biros  
Experiment = proton.jxp  
Sample Id = GS (OTF) 3La (O=PAR3) 3  
Solvent = CHLOROFORM-D  
Actual\_Start\_Time = 29-JUN-2021 13:54:11  
Revision\_Time = 29-JUN-2021 13:54:13

Data\_Format = 1D COMPLEX  
Dim\_Size = 26214  
X\_Domain = Proton  
Dim\_Title = Proton  
Dim\_Units = [ppm]  
Dimensions = X  
Site = GVSU-NMR  
Spectrometer = JNM-ECZ400S/L1

Field\_Strength = 9.389766 [T] (400 [MH]  
X\_Acq\_Duration = 3.27155712 [s]  
X\_Domain = Proton  
X\_Freq = 399.78219838 [MHz]  
X\_Offset = 5 [ppm]  
X\_Points = 32768  
X\_Prescans = 0  
X\_Resolution = 0.30566485 [Hz]  
X\_Sweep = 10.01602564 [kHz]  
X\_Sweep\_Clippped = 8.01282051 [kHz]  
Irr\_Domain = Proton  
Irr\_Freq = 399.78219838 [MHz]  
Irr\_Offset = 5 [ppm]  
Tri\_Domain = Proton  
Tri\_Freq = 399.78219838 [MHz]  
Tri\_Offset = 5 [ppm]  
Blanking = 2 [us]  
Clipped = FALSE  
Scans = 16  
Total\_Scans = 16

Relaxation\_Delay = 4 [s]  
Recvr\_Gain = 52  
Temp\_Get = 19.1 [dC]  
X\_90\_Width = 6.344 [us]  
X\_Acq\_Time = 3.27155712 [s]  
X\_Angle = 45 [deg]  
X\_Atn = 3.3 [dB]  
X\_Pulse = 3.172 [us]  
Irr\_Mode = Off  
Tri\_Mode = Off  
Dante\_Loop = 400  
Dante\_Preset = FALSE  
Decimation\_Rate = 0  
Experiment\_Path = c:\Program Files\JE  
Initial\_Wait = 1 [s]  
Phase = (0, 90, 270, 180, 1  
Preset\_Time = 4 [s]  
Preset\_Time\_Flag = FALSE  
Relaxation\_Delay\_Calc = 0 [s]  
Relaxation\_Delay\_Temp = 4 [s]  
Repetition\_Time = 7.27155712 [s]

GS(OTF)3La(O=PAR3)3\_90\_PROTON-1-2.jdf

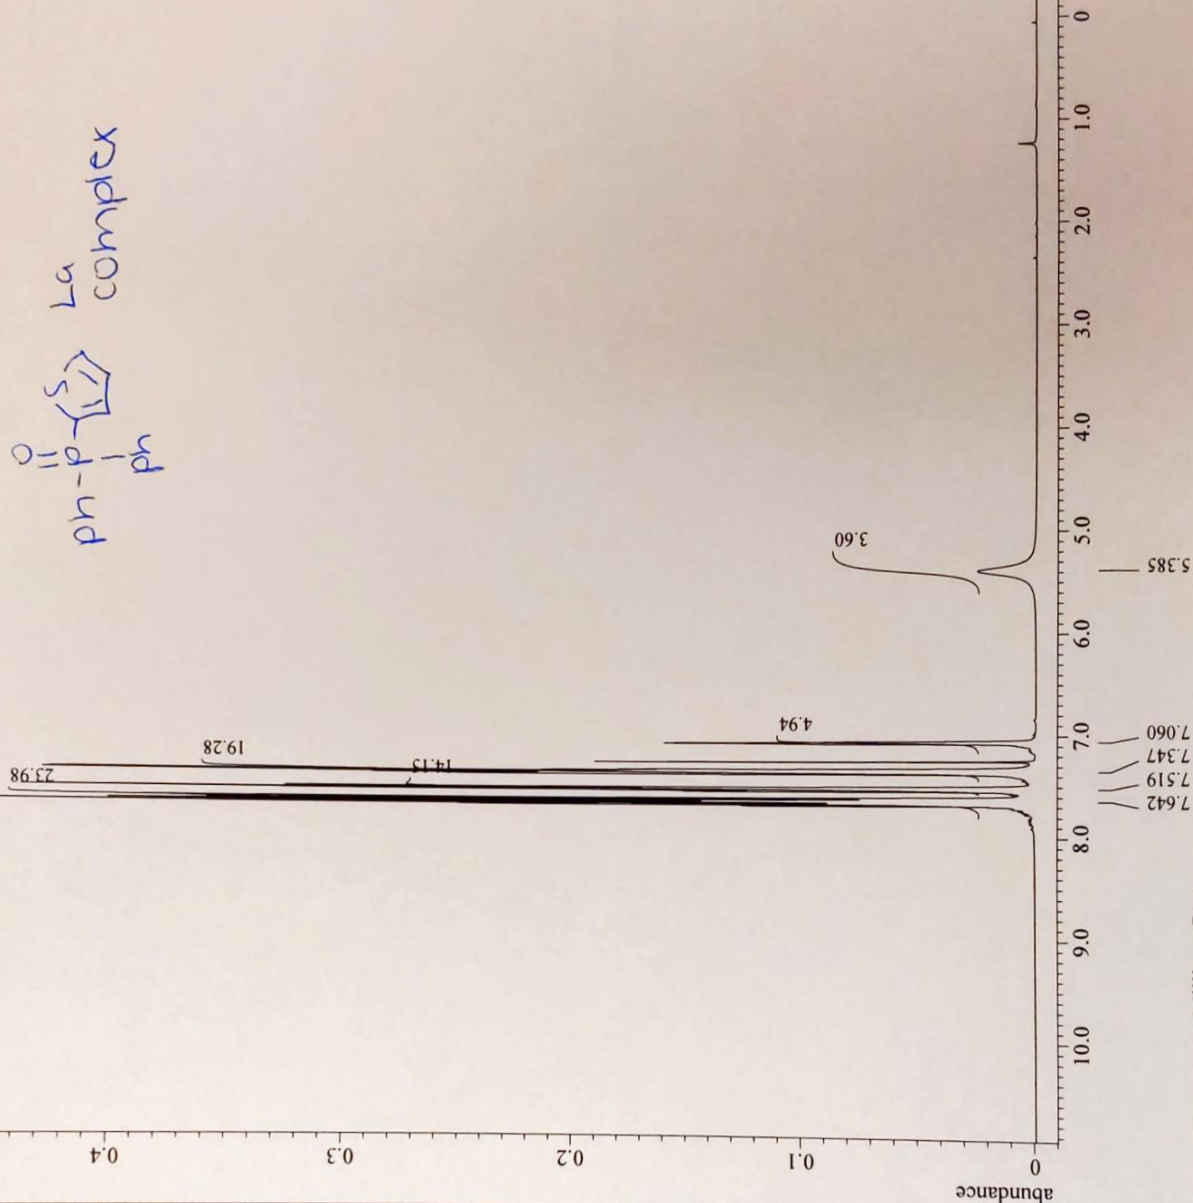

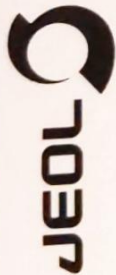

Filename = GS (OTF) 3La (O=PAR  
Author = biros  
Experiment = single pulse dec  
Sample\_Id = GS (OTF) 3La (O=PAR  
Solvent = CHLOROFORM-D  
Actual\_Start\_Time = 9-JUN-2021 13:4  
Revision\_Time = 9-JUN-2021 13:3

Data\_Format = 1D COMPLEX  
Dim\_Size = 26214  
X\_Domain = Phosphorus31  
Dim\_Title = Phosphorus31  
Dim\_Units = [ppm]  
Dimensions = X  
Site = GVSU-NMR  
Spectrometer = JNM-ECZ400S/L1

Field\_Strength = 9.389766[T] (400  
X\_Acq\_Duration = 0.3984588[s]  
X\_Domain = Phosphorus31  
X\_Freq = 161.83469309[MHz]  
X\_Offset = 0[ppm]  
X\_Points = 32768  
X\_Prescans = 4  
X\_Resolution = 2.50966925[Hz]  
X\_Sweep = 82.23684211[kHz]  
X\_Sweep\_Clippped = 65.78947368[kHz]  
Irr\_Domain = Proton  
Irr\_Freq = 399.78219838[MHz]  
Irr\_Offset = 5[ppm]  
Blanking = 5[us]  
Clipped = FALSE  
Scans = 64  
Total\_Scans = 64

Relaxation\_Delay = 2[s]  
Recvr\_Gain = 52  
Temp\_Get = 18.4[dc]  
X\_90\_Width = 15.324[us]  
X\_Acq\_Time = 0.3984588[s]  
X\_Angle = 30[deg]  
X\_Atn = 6.8[db]  
X\_Pulse = 5.108[us]  
Irr\_Atn\_Dec\_Calc = 29.239[db]  
Irr\_Atn\_Dec\_Calc = 29.239[db]  
Irr\_Atn\_Dec\_Default\_Calc = 29.239[db]  
Irr\_Atn\_No = 29.239[db]  
Irr\_Dec\_Bandwidth\_Hz = 4.7826087[kHz]  
Irr\_Dec\_Bandwidth\_Ppm = 11.96303566[ppm]  
Irr\_Dec\_Freq = 399.78219838[MHz]  
Irr\_Dec\_Merit\_Factor = 2.2  
Irr\_Decoupling = TRUE  
Irr\_No = TRUE  
Irr\_Noise = WALTZ  
Irr\_Offset\_Default = 5[ppm]  
Irr\_Pwidth\_Default = 0.115[ms]  
Irr\_Pwidth\_Default\_Calc = 0.115[ms]  
Irr\_Pwidth\_Default\_Calc = 0.115[ms]  
Irr\_Pwidth\_Templ = 0.115[ms]  
Irr\_Wurst = FALSE  
Decimation\_Rate = 0  
Experiment\_Path = c:\Program Files  
Initial\_Wait = 1[s]  
Noe\_Time = 2[s]

GS(OTF)3La(O=PAR)3\_54\_PHOSPHORUS\_1H\_DECOUPLED-1-2.jdf

30.0

20.0

10.0

(thousands)

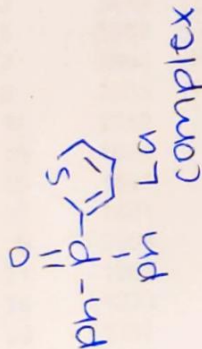

-100.0

100.0

29.201

X : parts per Million : Phosphorus31

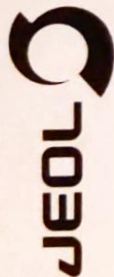

Filename = GS(OTF)3Sm(O=Ar3)3\_90\_PROTON-1+2.jdf  
Author = biros  
Experiment = proton\_jxp  
Sample\_Id = GS(OTF)3Sm(O=Ar3)3  
Solvent = CHLOROFORM-D  
Actual\_Start\_Time = 29-JUN-2021 13:59:2  
Revision\_Time = 29-JUN-2021 13:57:5  
Data Format = 1D COMPLEX  
Dim\_Size = 26214  
X\_Domain = Proton  
Dim\_Title = Proton  
Dim\_Units = [ppm]  
Dimensions = X  
Site = GVSU-NMR  
Spectrometer = JNM-ECZ400S/L1  
Field Strength = 9.389766[T] (400[MH  
X\_Acq\_Duration = 3.27155712[s]  
X\_Domain = Proton  
X\_Freq = 399.78219838[MHz]  
X\_Offset = 5[ppm]  
X\_Points = 32768  
X\_Prescans = 0  
X\_Resolution = 0.30566485[Hz]  
X\_Sweep = 10.01602564[kHz]  
X\_Sweep\_Clippped = 8.01282051[kHz]  
Irr\_Domain = Proton  
Irr\_Freq = 399.78219838[MHz]  
Irr\_Offset = 5[ppm]  
Tri\_Domain = Proton  
Tri\_Freq = 399.78219838[MHz]  
Tri\_Offset = 5[ppm]  
Blanking = 2[us]  
Clipped = FALSE  
Scans = 16  
Total\_Scans = 16  
Relaxation\_Delay = 4[s]  
Recvr Gain = 52  
Temp Get = 19.1[dc]  
X\_90\_Width = 6.344[us]  
X\_Acq\_Time = 3.27155712[s]  
X\_Angle = 45[deg]  
X\_Atn = 3.3[db]  
X\_Pulse = 3.172[us]  
Irr\_Mode = Off  
Tri\_Mode = Off  
Dante\_Loop = 400  
Dante\_Preset = FALSE  
Decimation\_Rate = 0  
Experiment\_Path = c:\Program Files\JE  
Initial\_Wait = 1[s]  
Phase = (0, 90, 270, 180, 1  
Preset\_Time = 4[s]  
Preset\_Time\_Flag = FALSE  
Relaxation\_Delay\_Calc = 0[s]  
Relaxation\_Delay\_Temp = 4[s]  
Repetition\_Time = 7.27155712[s]

GS(OTF)3Sm(O=Ar3)3\_90\_PROTON-1+2.jdf

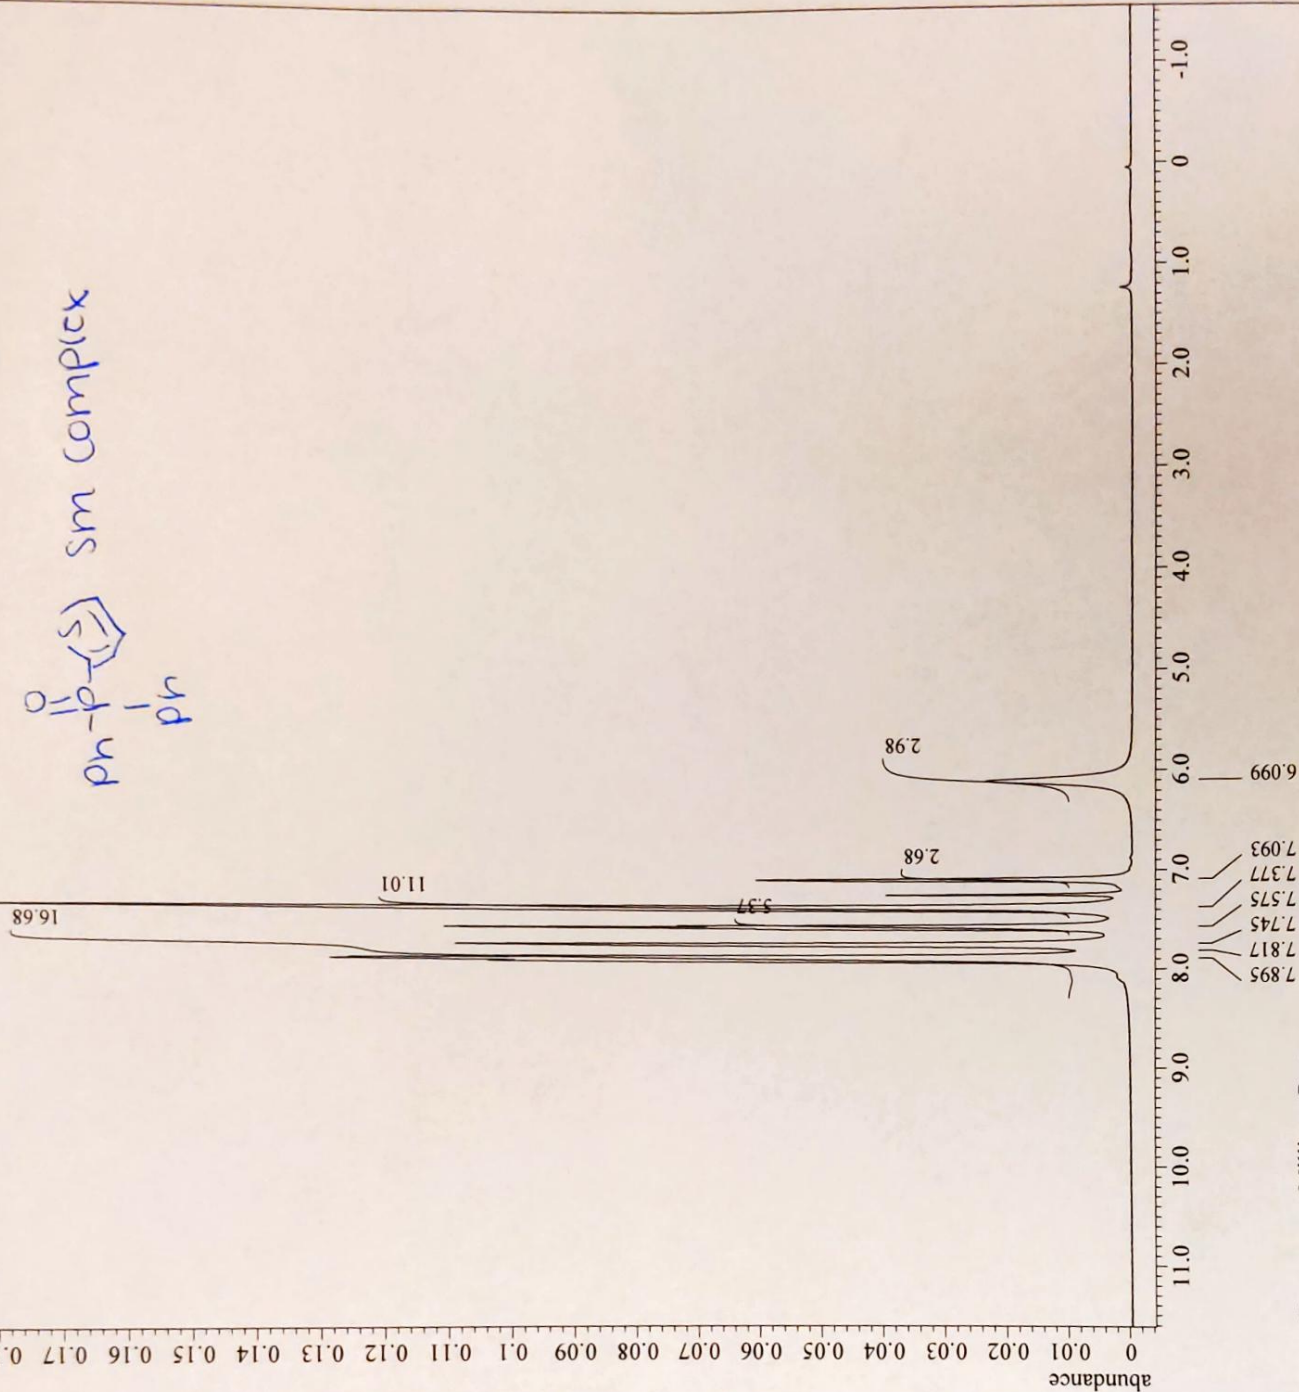

X : parts per Million : Proton

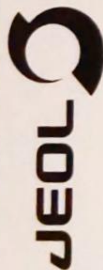

GS(OTF)3Sm(O=PAr3)3 53 PHOSPHORUS 1H DECOUPLED-1-2.jdf

Filename = GS(OTF) 3Sm(O=PAr  
Author = biroa  
Experiment = single\_pulse\_dec  
Sample Id = GS(OTF) 3Sm(O=PAr  
Solvent = CHLOROFORM-D  
Actual Start Time = 10-JUN-2021 13:2  
Revision Time = 10-JUN-2021 13:2  
Data Format = 1D COMPLEX  
Dim Size = 26214  
X\_Domain = Phosphorus31  
Dim Title = Phosphorus31  
Dim Units = [ppm]  
Dimensions = X  
Site = GVSU-NMR  
Spectrometer = JNM-ECZ400S/L1  
Field Strength = 9.389766[T] (400  
X Acq\_Duration = 0.39845888[s]  
X Domain = Phosphorus31  
X\_Freq = 161.83469309 [MHz]  
X\_Offset = 0 [ppm]  
X\_Points = 32768  
X\_Prescans = 4  
X Resolution = 2.50966925 [Hz]  
X Sweep = 82.23684211 [kHz]  
X\_Sweep\_Clippped = 65.78947368 [kHz]  
Irr\_Domain = Proton  
Irr\_Freq = 399.78219838 [MHz]  
Irr\_Offset = 5 [ppm]  
Blanking = 5 [us]  
Clipped = FALSE  
Scans = 64  
Total\_Scans = 64  
Relaxation\_Delay = 2[s]  
Recvr Gain = 52  
Temp Get = 18.2 [dc]  
X\_90\_Width = 15.324 [us]  
X Acq\_Time = 0.39845888 [s]  
X Angle = 30 [deg]  
X Atn = 6.8 [dB]  
X\_Pulse = 5.108 [us]  
Irr\_Atn\_Dec = 29.239 [dB]  
Irr\_Atn\_Dec\_Calc = 29.239 [dB]  
Irr\_Atn\_Dec\_Default\_Calc = 29.239 [dB]  
Irr\_Atn\_No = 29.239 [dB]  
Irr\_Dec\_Bandwidth\_Hz = 4.7826087 [kHz]  
Irr\_Dec\_Bandwidth\_Ppm = 11.96303566 [ppm]  
Irr\_Dec\_Freq = 399.78219838 [MHz]  
Irr\_Dec\_Merit\_Factor = 2.2  
Irr\_Decoupling = TRUE  
Irr\_No = TRUE  
Irr\_Noise = WALTZ  
Irr\_Offset\_Default = 5 [ppm]  
Irr\_Pwidth = 0.115 [ms]  
Irr\_Pwidth\_Default = 0.115 [ms]  
Irr\_Pwidth\_Default\_Calc = 0.115 [ms]  
Irr\_Pwidth\_Templ = 0.115 [ms]  
Irr\_Wurst = FALSE  
Decimation\_Rate = 0  
Experiment\_Path = c:\Program Files  
Initial Wait = 1[s]  
Noe\_Time = 2[s]

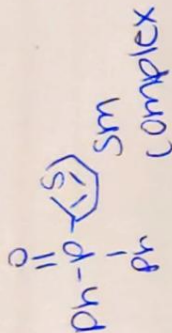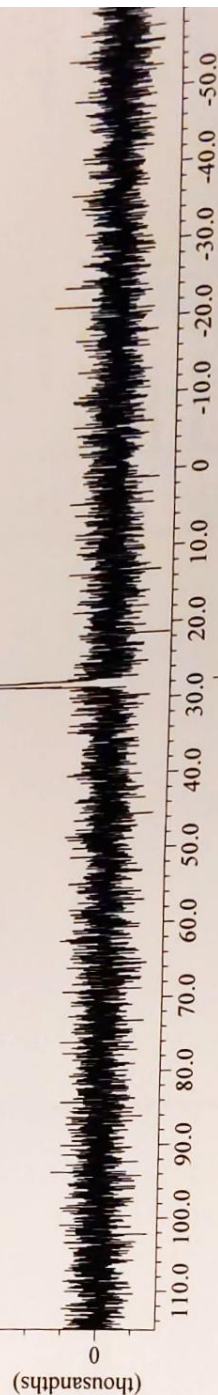

X : parts per Million : Phosphorus31
